1 **Title: mTORC1 deregulation and increased invasiveness cohere with**  
2 **dispersed endolysosomes in high-grade bladder cancer.**

3 **Running title: Endolysosome dysfunctions in the bladder cancer model**

4

5 Pallavi Mathur<sup>1,2,3</sup>, Camilla De Barros Santos<sup>1,2,3</sup>, Hugo Lachuer<sup>1,2</sup>, Bruno Latgé<sup>1,2</sup>,  
6 François Radvanyi<sup>2,4</sup>, Bruno Goud<sup>1,2</sup>, Kristine Schauer<sup>1,2,5</sup>

7

8 <sup>1</sup>Institut Curie, PSL Research University, Molecular Mechanisms of Intracellular  
9 Transport group, 75248 Paris Cedex 05, France

10 <sup>2</sup>Centre National de la Recherche Scientifique, Unité Mixte de Recherche 144, 75005  
11 Paris, France

12 <sup>3</sup>Equal author contribution

13 <sup>4</sup>Institut Curie, PSL Research University, Molecular Oncology group, 75248 Paris  
14 Cedex 05, France

15 <sup>5</sup>Corresponding author: kristine.schauer@curie.fr

16

17 **Keywords** Lysosomes, cell organization, 4EPB1, S6K, TFEB

18

19 **The authors declare no potential conflicts of interest.**

20

21 **Abstract**

22 Late endosomes/lysosomes (endolysosomes) emerge as a potential regulatory hub  
23 during cancer. Here, we investigate the intracellular landscape of this organelle in a  
24 collection of bladder cancer cell lines and normal human urothelium cells under  
25 standardized culture conditions. We find that high-grade bladder cancer cells are  
26 characterized by scattered endolysosomes that are accompanied by an altered cellular  
27 pH homeostasis and major changes of mTORC1 regulation. Mechanistically, we reveal  
28 that mTORC1 substrate specificity is altered, and mTORC1 responsiveness to  
29 endolysosome positioning is lost in high-grade cancer cells compared to low-grade  
30 cells, highlighting unexpected mechanisms of mTORC1 deregulation in the bladder  
31 cancer model. Because endolysosome positioning was critical for invasion from 3D  
32 spheroids, our results indicate that changes in their cellular positioning and ability to  
33 support signaling, strongly impact cancer cell behavior. Thus, monitoring detailed  
34 changes of endolysosomes at different steps of cancer disease reveals intricate spatial  
35 and temporal dimensions of tumorigenesis.

36

1 **Statement of significance**

2 Our study reveals significant changes of endolysosomes in bladder cancer  
3 progression, highlighting endolysosome dysfunction as a fundamental driving  
4 progress in malignancies. The identified alterations in endolysosome positioning and  
5 associated mTORC1 signaling regulation could help to stratify emerging therapeutic  
6 strategies targeting the endolysosomal compartment.

## 1 Introduction

2 Malignant transformation is characterized by major alterations in the  
3 intracellular landscape. However, with the exception of the nucleus, it is generally not  
4 well understood to which extend intracellular organelles are altered during  
5 carcinogenesis. In recent years, late endosomes/lysosomes (endolysosomes) have  
6 emerged as a potential regulatory hub during cancer development (Perera et al., 2019;  
7 Thelen and Zoncu, 2017; Hämälistö and Jäättelä, 2016). Endolysosomes are  
8 heterogeneous acidic organelles that are functionally similar to yeast and plant  
9 vacuoles. They are specialized in the degradation of extracellular molecules or  
10 pathogens internalized by endocytosis or phagocytosis, and the intracellular recycling  
11 of macromolecules and organelles sequestered by autophagy (Ballabio and  
12 Bonifacino, 2020; Lawrence and Zoncu, 2019; Perera and Zoncu, 2016; Thelen and  
13 Zoncu, 2017). In addition to this classic role in cellular clearance, several core  
14 functions of endolysosomes are often deregulated in cancer. Endolysosomes  
15 attenuate growth factor signaling (Pu et al., 2016), whose increase is a common  
16 feature of many cancers. They are also the storage compartments for secretory  
17 proteases that degrade extracellular matrix during invasion and regulate the trafficking  
18 of adhesion molecules for cell migration (Castro-Castro et al., 2016; Steffan et al.,  
19 2014). Significantly, the surface of endolysosomes is the cellular platform where the  
20 mammalian Target of Rapamycin Complex 1 (mTORC1), a conserved  
21 serine/threonine kinase complex, integrates chemically diverse nutrients and growth  
22 factor signaling to adjust cellular metabolisms through either promotion of biosynthesis  
23 or catabolism (Ballabio and Bonifacino, 2020; Thelen and Zoncu, 2017). One important  
24 target of mTORC1 is the MiT/TFE family of transcription factors, which promote the  
25 development of several cancers, including renal cell carcinoma, melanoma, and  
26 sarcoma (Perera et al., 2019). The MiT/TFE family of transcription factors, including  
27 transcription factor EB (TFEB) and MITF, are master regulators of lysosome  
28 biogenesis and autophagy. It has been shown that a positive feedback mechanism  
29 between mTORC1 and TFEB was sufficient to promote cancer growth in mouse  
30 models (Calcagni et al., 2016; Di Malta et al., 2017), and it is well established that  
31 MITF is an oncogene in melanoma (Perera et al., 2019). Moreover, endolysosomes  
32 are related to multivesicular bodies (MVB) that secrete one class of extracellular  
33 vesicles called exosomes that impact on tumor progression through exosome-  
34 dependent altering of stromal cell fate (Hyenne et al., 2017). Thus, endolysosomes  
35 seem to support several cellular pathways that are characteristic of tumors. Yet, it is  
36 not known whether and how endolysosomes change during cancer.

1 Here, we investigate the intracellular landscape of the endolysosomal compartment in  
2 a collection of bladder cancer cell lines as compared to normal human urothelium  
3 (NHU) cells. Bladder cancer represents the ninth most frequently-diagnosed cancer  
4 worldwide and fourth most common cancer in men in North America and Europe, thus  
5 is an important health burden (Antoni et al., 2017). Employing cell culture on adhesive  
6 micropatterns of defined geometry that allow normalization of cell shape, we find that  
7 high-grade bladder cancer cells are characterized by scattered endolysosomes that  
8 are accompanied by an altered cellular pH homeostasis, major changes of mTORC1  
9 signaling regulation and increased invasiveness.

## 10 **Results**

### 11 ***High-grade cancer cell lines are specifically characterized by scattered, 12 peripheral positioning of endolysosomes***

13 Because of the importance of endolysosomes in cellular homeostasis and its  
14 possible role in promoting cancer progression, we aimed at a systematic analysis of  
15 endolysosome morphology in a collection of bladder cancer cell lines and their  
16 comparison to primary normal human urothelium (NHU) cells. Bladder carcinomas are  
17 highly diverse, from low-grade luminal-like subtypes that are not very aggressive, to  
18 muscle-invasive bladder subtypes that are characterized by an aggressive behavior  
19 (Biton et al., 2014). We have analyzed seven broadly studied bladder cancer cell lines,  
20 namely MGHU3, RT4, RT112, KU19-19, T24, TCCSup and JMSU1. These cell lines  
21 show the diverse characteristics of bladder carcinomas. Therefore, to access the  
22 relation between the different tumor cell lines and compare them with NHU cells, we  
23 performed a principal component analysis employing transcriptome data of these cells  
24 (Figure 1A). As expected, the replicates of the NHU transcriptomes clustered together  
25 and separately from the tumor cells. The low-grade bladder cancer cell lines MGHU3  
26 and RT4 clustered in the upper left corner, positioning them away from high-grade  
27 bladder cancer cells JMSU1, TCCSup and T24 that were found in the lower right  
28 corner. The cell lines RT112 and KU19-19 were found between these two groups.  
29 Next, to compare these different cells at the morphological level, we cultured them on  
30 identical crossbow-shaped patterns. All tested cells were fully spread after 3h  
31 incubation, visualized by the average projection of the actin cytoskeleton  
32 (Supplementary Figure 1A), indicating that all cells adapted well to the micropatterns.  
33 We visualized the endolysosomal compartment by immunofluorescence staining of the  
34 lysosomal-associated membrane protein 1 (LAMP-1, CD107a, Figure 1B), acquired  
35 images in 3D and segmented them to obtain quantitative information. No clear trend  
36 in the average volume or the number of endolysosomes per cell was found among the



1 tested cell lines (Supplementary Figure 1B,C). Interestingly, the endolysosomal  
2 volume was negatively correlated with their total number (Supplementary Figure  
3 1B,C,D), implying that the balance between few large endolysosomes and many small  
4 ones is differently regulated in individual bladder cancer cells. Because the total cell  
5 spreading area is controlled by the micropattern and is similar between all cells, we  
6 additionally calculated the nearest neighbor distance (NND) of all endolysosomes in  
7 each cell. Interestingly, the average NND of NHU cells and low-grade bladder cancer  
8 cell lines was smaller than the average NND high-grade bladder cancer cell lines  
9 (Figure 1C), indicating that endolysosomes are more scattered throughout the cell in  
10 high-grade bladder cancer cell lines. To better characterize the observed changes in  
11 endolysosomes, we chose four cell lines for detailed analysis, namely MGHU3 and  
12 RT112, KU19-19, and JMSU1. Invasion assays from spheroids into collagen matrix  
13 confirmed that MGHU3 was the less invasive cell line (invasion at 5d), followed by  
14 RT112 (invasion at 3d), KU19-19 and JMSU1 that both invaded at 1d, however  
15 whereas KU19-19 invaded via collective migration of few leader cells from few sites,  
16 JMSU1 escaped spheroids via single cells throughout the entire spheroid surface  
17 (Supplementary Figure 1E). Similarly, in agreement to the notion that nucleus size  
18 increases with transformation, the nuclei in micropatterned cells showed an increase  
19 in size from NHU cells to JMSU1 cells (Supplementary Figure 1F). To further analyze  
20 the average positioning of compartments we employed our original method based on  
21 probabilistic density maps to visualize the smallest cellular volume containing 50% of  
22 endolysosomes (Schauer et al., 2010). The corresponding density maps revealed  
23 striking differences between NHU and cancer cell lines (Figure 1D): while in NHU and  
24 MGHU3 cells endolysosomes were positioned centrally, they were found to be spread  
25 out to the periphery in RT112, KU19-19 and JMSU1 cells with strongest phenotype in  
26 high-grade cancer cell lines. To verify that positioning changes were not induced by  
27 micropatterning, we analyzed endolysosomes in classical cell culture conditions and  
28 classified them as peripheral, intermediate and perinuclear depending on their relative  
29 positioning between the nucleus and plasma membrane (Figure 1E and  
30 Supplementary Figure 1G). In agreement with our density map analysis, we found that  
31 the percentage of peripheral endolysosomes significantly increased from MGHU3 to  
32 JMSU1, with JMSU1 showing as much as 30% of peripheral endolysosomes.  
33 Endolysosomes are acidic compartments that acquire their characteristic pH through  
34 the transport of protons from the cytosol through V-type ATPases (Lawrence and  
35 Zoncu, 2019). Endolysosomes change their positioning as a response to changes in  
36 the cytosolic pH and acidic conditions disperse the endolysosomes to cell periphery in  
37 a rapid and reversible manner (Korolchuk et al., 2011), although the underlying

1 biological significance is not well understood. Thus, we asked whether peripheral  
2 positioning in bladder cancer cell lines are accompanied by acidification of the  
3 cytoplasm. To test this, we incubated cells with the commercially available dye pHrodo-  
4 green, whose fluorescence intensity increases with decreasing pH. We found that  
5 cytoplasmic pH was indeed decreased in high-grade cancer cells as compared to low-  
6 grade cell line MGHU3, the JMSU1 cells showing the lowest pH (Figure 1F,G). Our  
7 analyses collectively indicate that the endolysosomal compartment shows differences  
8 between high-grade and low-grade bladder cancer cell lines as well as NHU. The most  
9 prominent alteration was a scattered, peripheral positioning of the endolysosomal  
10 compartment, accompanied by intracellular acidification, that we found as a specific  
11 feature of high-grade bladder cancer cell lines.

12

### 13 ***Altered endolysosomes reveal changes in mTORC1 substrates in cancer*** 14 ***progression***

15 Endolysosomes are the cellular signaling platform of the mammalian target of  
16 rapamycin (mTORC1), the main regulator of cell proliferation and survival which plays  
17 a key role in carcinogenesis (Calcagni et al., 2016; Di Malta et al., 2017). Because  
18 mTORC1 signaling has been shown to be regulated by endolysosomes positioning  
19 (Korolchuk et al., 2011; Perera and Zoncu, 2016), we wondered whether altered  
20 endolysosome positioning across different bladder cancer cell lines affected mTORC1  
21 signaling. We tested mTORC1 activity in bladder cancer cell lines monitoring the  
22 phosphorylation of several direct downstream substrates. First, we analyzed eIF4E  
23 Binding Protein (4EBP1) and p70-S6 Kinase 1 (S6K1) that are phosphorylated during  
24 activation of protein synthesis under control of mTORC1. Interestingly, whereas  
25 phosphorylation of 4EBP1 was high in high-grade cells KU19-9 and JMSU1 as  
26 compared to MGHU3 and RT112 cells (Figure 2A), phosphorylation of S6K1 was  
27 opposite: we detected low phosphorylation of S6K1 in high-grade bladder cancer cell  
28 lines compared to MGHU3 and RT112 cells (Figure 2B). Note that the total protein  
29 level of 4EBP1 was also upregulated in high-grade cell lines (Figure 2A) whereas the  
30 total protein level of S6K remained the same in all cell lines. Employing rapamycin and  
31 torin, which directly inhibit mTORC1 (Dumont and Su, 1995; Liu et al., 2010),  
32 wortmannin that inhibits upstream signaling as well as starvation that switches off  
33 mTORC1, we verified that both 4EBP1 and S6K1 phosphorylation was dependent on  
34 mTORC1 activity (Supplementary Figure 2A-D). Moreover, we monitored cellular  
35 localization of the transcription factors TFEB employing transfection of plasmid EGFP-  
36 N1-TFEB and monitoring cells 48h after transfection. We found that TFEB was  
37 retained in the cytosol in the majority of MGHU3 and RT112 cells whereas the

1 majority of TFEB was found translocated into the nucleus in high-grade bladder cancer  
2 cell lines, KU1919 and JMSU1 (Figure 2C). This indicated that TFEB was stronger  
3 phosphorylated by mTORC1 in low-grade bladder cancer cell lines in which P-TFEB  
4 was retained in the cytoplasm. Again, as expected, translocation into the nucleus was  
5 induced upon rapamycin treatment in all cell lines indicating mTORC1 specificity  
6 (Supplementary Figure 2E). Overall, our results convey that mTORC1 activity is  
7 maintained across all grades in bladder cancer cell lines, but that substrate specificity  
8 of mTORC1 changes in different bladder cancer cell lines: MGHU3 and RT112 show  
9 a high mTORC1 phosphorylation of S6K1 and TFEB that is retained in the cytosol.  
10 High-grade bladder cancer cell lines, KU19-19 and JMSU1, show a high mTORC1  
11 phosphorylation of 4EBP1 that is upregulated in these cell lines. Consistent with these  
12 results, we found that mTORC1 localizes on endolysosomes in all analyzed bladder  
13 cancer cell lines, which supports an active state of mTORC1 (Figure 2D).

14

15 ***mTORC1 signaling does not respond to endolysosomes positioning changes in***  
16 ***high-grade bladder cancer cell line***

17 Next, we investigated how mTORC1 signaling responds to changes in  
18 endolysosome positioning within different cell lines. Nutrient status, pH and growth  
19 factors affect endolysosome positioning and impact on mTORC1 signaling (Ballabio  
20 and Bonifacino, 2020; Thelen and Zoncu, 2017), indicating that endolysosomes  
21 integrate different upstream signals via positioning for mTORC1 signaling (Korolchuk  
22 et al., 2011). Thus, in order to directly test mTORC1 activity due to endolysosome  
23 positioning, independent of the complex regulation by nutrients, we performed all  
24 assays in full media and specifically altered endolysosome positioning via recruitment  
25 or targeting of motor proteins. Dynein is the retrograde motor required for  
26 endolysosomal transport towards the cell center (Pu et al., 2016). To change  
27 positioning of endolysosomes, we induced recruitment of dynein on them employing  
28 FKBP/FRB heterodimerization by the A/C heterodimerizer, a strategy that has been  
29 previously validated (van Bergeijk et al., 2015). We engineered RT112 and JMSU1  
30 cells, representing non-aggressive and aggressive cell lines, respectively, to stably  
31 express FKBP-fused to Lamp1-mCherry and FRB-fused to the dynein adaptor BicD2  
32 (Supplementary Figure 3A). In these cell lines, addition of A/C heterodimerizer to the  
33 culture medium redistribute endolysosomes toward the cell center where they strongly  
34 cluster (Supplementary Figure 3B). We monitored mTORC1 activity by visualizing  
35 phosphorylation of 4EBP1 and nuclear translocation of TFEB in RT112 and JMSU1  
36 cells. We found that whereas A/C heterodimerizer-induced clustering of  
37 endolysosomes in RT112 cells decreased 4EBP1 phosphorylation, clustering of

1 endolysosomes in JMSU1 cells did not change 4EBP1 phosphorylation levels (Figure  
2 3A, B). Similarly, we found monitoring TFEB that its nuclear translocation was  
3 increased in RT112 cells but not in JMSU1 cells after A/C heterodimerizer-induced  
4 endolysosome clustering (Figure 3C, D). To further confirm these results, we altered  
5 endolysosome positioning by targeting the small GTPases Arl8b or Rab7, which  
6 regulate the recruitment of molecular motors on endolysosomes (Supplementary  
7 Figure 3C). Arl8b recruits kinesins for anterograde transport (Pu et al., 2016), and thus  
8 gene silencing of Arl8b leads to retrograde movement of endolysosomes to the cell  
9 center (Supplementary Figure 3D). Similar to the A/C heterodimerizer-induced  
10 clustering of endolysosomes, siArl8b decreased phosphorylation of 4EBP1 in RT112  
11 but not in JMSU1 (Supplementary Figure 3E, F). However, preventing recruitment of  
12 dynein and thus anterograde movement of endolysosomes to the cell periphery by  
13 silencing Rab7 (Pu et al., 2016) did not change the levels of phosphorylated 4EBP1 in  
14 either cell line (Figure 3D-F). Finally, we investigated mTORC1's localization on  
15 endolysosomes after changing their positioning. Consistent with our previous results,  
16 we found that upon A/C heterodimerizer-induced clustering mTORC1 was lost from  
17 endolysosomes in RT112 cells (Figure 3E). Contrary, in JMSU1 cells, mTORC1  
18 remained on clustered endolysosomes (Figure 3F). Altogether, our results show that  
19 mTORC1 recruitment, and thus mTORC1 signaling respond to endolysosomes  
20 positioning in non-aggressive RT112 cells but not in high-grade JMSU1 cells.

21

### 22 ***Endolysosome positioning regulates invasion of bladder cancer cell lines***

23 Finally, we investigated whether endolysosomes positioning impacts the  
24 invasive capacity of cells. We employed our FKBP/FRB engineered cell lines RT112  
25 and JMSU1 to directly control endolysosome positioning and performed 3D invasion  
26 assay based on collagen I matrix invasion from cell spheroids. Invasion from RT112  
27 spheroids occurred via collective migration of few leader cells that invaded the collagen  
28 matrix on average on day 3 (Supplementary Figure 1E), thus spheroids from RT112  
29 cells were observed for 5 consecutive days (Figure 4A). A/C heterodimerizer treatment  
30 in control did not affect endolysosome positioning, and FKBP/FRB engineered cells  
31 showed comparable invasion behavior as control cells treated or not with A/C  
32 heterodimerizer (Supplementary Figure 4A, B). Strikingly, we found that A/C  
33 heterodimerizer-induced endolysosome clustering significantly reduced invasion from  
34 spheroids in RT112 cells, increasing the time of invasion to five days and the fraction  
35 of non-invasive spheroids from 20% to almost 90% (Figure 4B, C). We did not observe  
36 alteration in spheroid growth, indicating that under this condition cell proliferation was  
37 not affected. To confirm that endolysosome positioning can impact on invasion we

1 additionally targeted several cellular regulators that regulate endolysosome  
2 positioning. When targeting *Arl8b* to displace endolysosomes towards the cell center  
3 in RT112 cells, we again observed a significant decrease in spheroid invasion (Figure  
4 4D and Supplementary Figure 4C). Contrary, when we displaced endolysosomes  
5 towards the cell periphery by silencing *Rab7*, invasion was significantly earlier than in  
6 control cells (Figure 4E and Supplementary Figure 4C).

7 In striking difference, invasion from JMSU1 spheroids occurred via escape of single  
8 cells that invaded the collagen matrix after 3h (Supplementary Figure 1E, 4D).  
9 Contrary to RT112 cells, we did not observe any delay in invasion in JMSU1 cells upon  
10 A/C heterodimerizer-induced clustering of endolysosomes (Supplementary Figure 1E),  
11 indicating that invasion of JMSU1 was independent of endolysosome positioning.  
12 Taken together these results indicate that endolysosomes are critical players in cell  
13 invasion and that their changes during cancer progression, characterized by changes  
14 in their cellular positioning and ability to support signaling, strongly impact cancer cell  
15 behavior.

16

## 17 **Discussion**

18 Endolysosome dysfunction as a driving progress of cancer has been previously  
19 proposed (Perera et al., 2019; Zoncu et al., 2011; Perera et al 2016) and our results  
20 confirm that the endolysosomal compartment shows consistent alterations in a  
21 collection of bladder cancer cell lines. Surprisingly, we did not find an increase in the  
22 average number or volume of endolysosome in the bladder cancer model but rather  
23 changes of endolysosomal positioning that were more scattered and peripheral than  
24 in NHU cells. A general enlargement of the endolysosomal compartment could have  
25 been expected, because excessive endolysosomal activity has been proposed as a  
26 recurrent feature in cancer (Perera et al., 2019). Indeed, increased lysosome  
27 biogenesis and abundant lysosomes were observed in several cancer models, alveolar  
28 soft part sarcoma, pancreatic ductal adenocarcinoma and melanoma that all show  
29 hyperactivation of *MiT/TFE* transcription factors and upregulation of the *mTORC1*  
30 regulatory small GTPases *RagD* that expands the endolysosomal compartment (Di  
31 Malta et al., 2017; Perera et al., 2019). In agreement with our results, we also did not  
32 find up-regulation of *Rag* genes in the transcriptome data of the bladder cancer cell  
33 lines (data not shown). However, changes in endolysosome positioning in bladder  
34 cancer cell lines were associated with alterations of the fundamental *mTORC1*  
35 signaling pathways, shown to be involved in cancer progression (Bar-Peled et al.,  
36 2013; Di Malta et al., 2017). First, we found that *mTORC1* was active in all cell lines  
37 despite of different endolysosome positioning. Yet, whereas low-grade cell lines

1 MGHU3 or non-aggressive RT112 show high mTORC1 phosphorylation activation  
2 towards S6K1 and TFEB, high-grade bladder cancer cell lines, KU19-19 and JMSU1,  
3 show high mTORC1 activity towards 4EBP1. It should be noted, that the total levels of  
4 4EBP1 were additionally increased in high-grade cells, indicating dysregulation of  
5 mTORC1 signaling by substrate competition. Although 4EBP1 and S6K1 both  
6 contribute to the regulation of translation, 4EBP1 has the higher affinity towards  
7 mTORC1 (Choo and Blenis, 2009). Thus, the preferential phosphorylation of 4EBP1  
8 in high-grade cancer cell lines could allow to simultaneously keep maintenance of the  
9 cellular translation machinery and the nuclear translocation of TFEB that both seem to  
10 be regulated mutually exclusive by mTORC1 in non-transformed cells (Perera et al  
11 2016). Given the fact that 4EBP1 has been suggested to be a tumor suppressor and  
12 its overexpression was shown to be associated with an unfavorable prognosis in a  
13 recent meta-analysis (Zhang et al., 2017), including bladder cancer, our results  
14 suggest that shifting substrates could be a strategy to fuel the overgrowth of bladder  
15 cancers. In the future, it will be important to further investigate whether this mechanism  
16 could be a driving progress in bladder cancer and potentially other cancer models.

17 Second, we found that mTORC1 signaling is specifically decoupled from  
18 endolysosome positioning in high-grade bladder cancer cell lines. Through a  
19 sophisticated machinery that dynamically assembles mTORC1 on the surface of  
20 endolysosomes, signals from nutrients in the cytoplasm, inside endolysosomes as well  
21 as outputs downstream of growth factor signaling are integrated (Thelen and Zoncu,  
22 2017). Notably, this machinery is coordinated with endolysosome positioning, as  
23 nutrient status or growth factors simultaneously change endolysosome positioning  
24 (Ballabio and Bonifacino, 2020; Thelen and Zoncu, 2017). An emerging picture is that  
25 dynamic endolysosome positioning helps to integrate the many upstream signals for  
26 mTORC1 via spatial compartmentalization, although the exact relation between  
27 endolysosome positioning and mTORC1 signaling remains controversial (Walton et  
28 al., 2019): whereas mTORC1 was shown to signal from peripheral endolysosomes in  
29 some studies (Korolchuk et al., 2011), others suggest the presence of active mTORC1  
30 on central endolysosomes (Walton et al., 2019). Although mTORC1 signaling was  
31 present in low-grade cell lines with moderate central endolysosome positioning, we  
32 found that central clustering of endolysosomes via enforced recruitment of minus-end  
33 motor proteins leads to loss of mTORC1 and attenuation of downstream signaling in  
34 non-aggressive bladder cancer cell lines. Indeed, mTORC1 dissociation from  
35 endolysosomes in nutrient deficient or starvation conditions often correlates with  
36 displacement of endolysosomes to the cell center (Korolchuk et al., 2011; Perera and



1 Zoncu, 2016). Interestingly, we did not observe a loss of mTORC1 from clustered  
2 endolysosomes in high-grade cancer cell lines, indicating that mTORC1 responses are  
3 uncoupled from endolysosome positioning. As nutrient status and endolysosome  
4 positioning are tightly linked, the loss of the spatial compartmentalization of mTORC1  
5 signaling may help cancer cells to evade metabolic checks on anabolism and  
6 proliferation. Future studies will address by which mechanisms mTORC1 is retained  
7 on central endolysosomes in high-grade bladder cancer cells.

8 Finally, we found that endolysosomes are important for invasion of bladder cancer cells  
9 in the 3D spheroid model. Interestingly, invasion of non-aggressive cell line RT112,  
10 which shows intermediate upregulation of 4EBP1 (compared to low-grade MGHU3  
11 cells) and responsiveness of mTORC1 signaling to endolysosome positioning, was  
12 controlled by placement of endolysosomes. Whereas central positioning led to  
13 decreased invasiveness, peripheral positioning had the opposite effect. Invasion was  
14 observed from isolated loci after several days and showed phenotypes typical for  
15 collective cell migration. Contrary, high-grade cancer cell line JMSU1, which shows a  
16 high expression of 4EBP1 and no responsiveness of mTORC1 signaling to  
17 endolysosome positioning, invaded rapidly (after 3h) by single cell escape and  
18 invasiveness was not regulated by endolysosome positioning. Our study proposes that  
19 monitoring detailed changes of the endolysosome compartment could reveal intricate  
20 spatial and temporal dimensions of tumorigenesis (Figure 4F). Besides the alterations  
21 in mTORC1 signaling that we observed in bladder cancer cells, important for cellular  
22 homeostasis and nutrient balance, endolysosome positioning regulates protease  
23 secretion/proteolysis (Castro-Castro et al., 2016; Steffan et al., 2014), migration (Pu et  
24 al., 2016) and remodeling of tumor environment through the release of exosomes  
25 (Hyenne et al., 2017). Indeed, proteins and mechanisms implicated in endolysosome  
26 positioning are often found to be deregulated in the progression of different kind of  
27 cancers (Dykes et al., 2016; Steffan et al., 2014). Thus, it is tempting to speculate that  
28 altered endolysosomes could link dysregulation of metabolism, signaling or/and  
29 trafficking to invasiveness and migration that characterize cancer cell behavior.

30 One important question to address in the future is why endolysosomes change  
31 positioning in high-grade bladder cancer cell lines. It was previously reported that  
32 endolysosomes are more peripheral due to acidification of the extracellular tumor  
33 microenvironment (Steffan et al., 2014; Walton et al., 2019) that is a common feature  
34 of cancer. Interestingly, we found that endolysosome positioning changes are  
35 accompanied by a decrease in intracellular pH. As both extracellular and intracellular  
36 pH regulate endolysosome displacement (Walton et al., 2019) and are closely coupled

1 to cellular metabolism and its regulation via mTORC1, it will be critical to investigate in  
2 detail how metabolic rewiring, common to all cancer cells, is interconnected with pH  
3 homeostasis and endolysosome positioning.

4 In conclusion our study revealed characteristic changes in endolysosome  
5 positioning that were associated with unexpected outcomes of mTORC1 signaling in  
6 a collection of bladder cancer cell lines. Particularly, we revealed that mTORC1  
7 substrate specificity is altered, and responsiveness to endolysosome positioning is lost  
8 in high-grade bladder cancer cell lines as compared to low-grade cancerous cells.  
9 Importantly, our results suggest that endolysosome positioning is critical for cell  
10 invasion from 3D spheroids. Our study proposes that monitoring detailed changes of  
11 the endolysosome compartment at different steps of cancer disease could reveal  
12 intricate spatial and temporal dimensions of tumorigenesis. Targeting lysosomal  
13 function is emerging as a promising avenue in several malignancies (Hämälistö and  
14 Jäätelä, 2016) and a full understanding of the basic biological processes underlying  
15 transitions during cancer progression will be critical to improve cancer detection,  
16 prevention, and the rational design of more effective and less toxic therapeutic  
17 strategies.

18

## 19 **Methods**

### 20 *Cell culture*

21 Bladder cancer cells lines MGHU3, RT112, KU19-19, JMSU1, T24 and TCCSup were  
22 grown in RPMI medium (Life Technologies, Carlsbad, CA, USA), supplemented with  
23 10% Fetal Bovine Serum (FBS; Eurobio, Courtaboeuf, France). RT112 and JMSU1  
24 cells stably expressing Lamp1-mCherry-FKBP and BicD2-HA-FRB were obtained via  
25 viral transduction. For A/C heterodimerizer induced endolysosome clustering in cells  
26 stably expressing the FKBP-FRB system, 0.5  $\mu$ M of A/C heterodimerizer (635056;  
27 Takara) was added in complete media for 1 hour at 37 °C. Normal human urothelium  
28 (NHU) cells were from Jennifer Southgate (University of York, UK). NHU were grown  
29 in KSFMC medium according to (Southgate et al., 1994, 2002). For experiments with  
30 inhibitors, the day after cell seeding, respective drugs were added for 2 hours at 37°C.  
31 The concentration of inhibitors used were as follows: Rapamycin (20 $\mu$ M), Wortmannin  
32 (1 $\mu$ M), Torin (1 $\mu$ M). For starvation experiment, the day after cell seeding, the media  
33 was removed and cells were washed once with EBSS (Earle's Balanced Salt Solution)  
34 and incubated in EBSS for 4hours before lysate preparation.

35

### 36 *Cell transfection*

37 For gene depletion studies, 200 000 cells were transfected in 6 well plate with 25



1 pmol.mL<sup>-1</sup> siRNA (siLuc: 5'-CGTACGCGGAATACTTCGA-3'; siRab7: 5'-  
2 CACGTAGGCCTTCAACACAAT-3' and 5'-CTGCTGCGTTCTGGTATTTGA-3';  
3 siArl8b: 5'- GAUAGAAGCUUCCCGAAAU-3'; Sigma-Aldrich) using Lipofectamine  
4 RNAiMAX Transfection Reagent (5 µL.mL<sup>-1</sup>; Life Technologies). Cells were incubated  
5 72 h prior to further manipulations. Efficiency of siRNA gene silencing was verified by  
6 Western Blot on cell lysate after three days of transfection. In invasion assays, the  
7 siRNA was added into the collagen mix. For plasmid transfection, 100 000 cells were  
8 transfected in a 12 well plate on sterilized coverslips (12mm) using Lipofectamine LTX  
9 with Plus reagent (Invitrogen). pEGFP-N1-TFEB plasmid was a gift from Shawn  
10 Ferguson (Addgene plasmid # 38119; <http://n2t.net/addgene:38119>;  
11 RRID:Addgene\_38119n (Roczniak-Ferguson et al., 2012)). Cells were transfected  
12 using 1 µg of plasmid for 48 hours before PFA fixation and imaging.

13

#### 14 *PCA analysis*

15 Micro array data were analyzed with R (3.5.2). The annotation was performed using  
16 affy package (1.58.0) with a custom CDF from brain array (huex10st, genome version  
17 23). Normalization was done with RMA algorithm and batch effect corrected with  
18 ComBat. The PCA was computed from these normalized and corrected data.

19

#### 20 *Micropatterned coverslips preparation and cell seeding*

21 Micropattern production was as previously described (Schauer et al., 2010) using  
22 photo-lithography methods. Briefly, coverslips were coated with Poly-L-Lysine(20)-  
23 grafted[3.5]-Polyethyleneglycol(2) (PLL-g-PEG) from SuSoS (Dübendorf, Switzerland)  
24 at a final concentration of 0.1 mg.mL<sup>-1</sup> in 10 mM HEPES (pH 7,3) solution. Coverslips  
25 were exposed to deep UV during 5 min using a photomask containing arrays of  
26 crossbows (37 µm diameter, 7 µm thick). Prior to cell seeding, the patterned surface  
27 was incubated for 1h with a mixture of 50 µg/ml fibronectin (Sigma-Aldrich, St. Louis,  
28 MO, USA), 5 µg/ml concanavalin A (Sigma-Aldrich, St. Louis, MO, USA) and 1 µg/ml  
29 fibrinogen–Cy5 (Invitrogen). Cells were seeded on micropatterns in RPMI medium  
30 supplemented with 20 mM HEPES (Life Technologies) for 4 h prior the experiment.

31

#### 32 *Immunofluorescence, image acquisition and processing*

33 Cells were fixed with 4 % formaldehyde for 15 min at room temperature, washed three  
34 times with PBS and permeabilized in PBS/0.2% BSA/0.05% saponin. Cells were then  
35 incubated with the primary antibodies (mouse monoclonal antibody against  
36 Lamp1/CD107a (555798, BP Pharmingen™), rabbit mAb against mTOR (7C10,  
37 #2983, Cell Signaling Technology)) and Alexa Fluor 488- or Cy3- coupled secondary

1 antibodies (Jackson ImmunoResearch) for 1 h. Actin was visualized by FluoProbes  
2 547H (557/572nm) coupled Phalloïdin (Interchim) and nuclei with 0.2  $\mu\text{g}.\text{ml}^{-1}$  4',6-  
3 diamidino-2-phenylindole (DAPI; Sigma-Aldrich). Slices were mounted in Mowiol  
4 (Sigma-Aldrich). Images from immunolabelled cells were acquired with an inverted  
5 wide field Deltavision Core Microscope (Applied Precision) equipped with highly  
6 sensitive cooled interlined charge-coupled device (CCD) camera (CoolSnap Hq2,  
7 Photometrics). Z-dimension series were acquired every 0.5  $\mu\text{m}$ . For each experiment,  
8 several tens of cells were imaged and aligned using the coordinates of the center and  
9 the angle of rotation of the micropattern (determined on ImageJ (Bethesda, MD, USA)  
10 as previously described (Schauer et al., 2010). To extract the 3D spatial coordinates  
11 of intracellular structures, images were segmented with the multidimensional image  
12 analysis (MIA) interface on MetaMorph (Molecular Devices, Sunnyvale, CA, USA)  
13 based on wavelet decomposition.

14

#### 15 *Kernel density estimation*

16 The coordinates of the segmented structures were processed for density estimation  
17 programmed in the ks library in R according to (Schauer et al., 2010). For visualizing  
18 kernel density estimates, we used probability contours and the extension libraries  
19 mvtnorm, rgl, and miscd.

20

#### 21 *Invasion assay*

22 Cells were trypsinized and  $10^4$  cells/ml were re-suspended in RPMI medium containing  
23 10% FBS and 1% Penicillin-Streptomycin (Life Technologies). Then 100  $\mu\text{l}$  of cell  
24 suspension was plated in 48-well plates coated with 1% agarose (Life Technologies)  
25 and incubated for 3 days. In each well, a spheroid was formed from  $10^3$  cells. Next,  
26 the spheroids were plated on Lab-Tek chambers (Sigma), in a mixture of collagen I  
27 from rat tail (Corning) at a final concentration of 2  $\text{mg}.\text{ml}^{-1}$ , PBS, sodium hydroxide  
28 (NaOH) and serum-free medium. For siRNA experiments, the medium was replaced  
29 with the transfection mixture (Opti-MEM medium from Life Technologies, Lipofectamin  
30 RNAiMAX and siRNA). For inducible cargo trafficking assays, 0.5  $\mu\text{M}$  of A/C  
31 heterodimerizer (635056, Takara) was added to the collagen mixture and the culture  
32 medium. The spheroids were monitored for 5 consecutive days by using an inverted  
33 Leica microscope (Wetzlar, Alemanha) equipped with camera device using 4x  
34 objective.

35

#### 36 *Cytoplasmic pH testing:*

37 Cells (200,000) were seeded in 35mm Fluorodishes and stained with pHRodo Green

1 (Invitrogen) according to the manufacturer's protocol along with 50nM LysoTracker  
2 Deep Red (Invitrogen) and incubated at 37°C for 1 hour. Cells were washed with  
3 complete RPMI media and imaged live using an inverted wide field Deltavision Core  
4 Microscope. For calculating the RFU (Relative Fluorescence Unit) of cytoplasmic pH,  
5 25,000 cells were seeded in black bottom 96 well cell culture plates and stained with  
6 pHRodo Green as before for 1 hour at 37°C. Cells were then washed with complete  
7 RPMI 1640 media and readings were taken using CLARIOstar plate reader (BMG  
8 LABTECH) using excitation/emission of 509/533.

9

#### 10 *Western Blot*

11 Cells were seeded in a 12 well plate (250,000) one day prior to the experiment. To  
12 prepare lysates, cells were lysed in loading buffer ( $\beta$ -Mercaptoethanol (6%),  
13 Bromophenol blue (0.02%) Glycerol (30%), SDS (Sodium dodecyl sulfate) (10%), Tris-  
14 Cl (250 mM, pH 6.8), and 1X Protease Inhibitor Cocktail) on ice, boiled at 95°C for 5  
15 min and stored at -20 °C before further use. On the day of western blot, lysates were  
16 thawed and passed through a syringe to shred genomic DNA. Equal volume of lysates  
17 from each cell line was loaded on a 10% or 12% polyacrylamide gel. Proteins were  
18 then resolved by SDS-PAGE. Proteins were transferred to nitrocellulose membranes  
19 which was then blocked with 5% BSA in TBST (for phospho-antibodies) or 5% milk in  
20 TBST (for all other antibodies). Membranes were incubated with respective primary  
21 antibodies at 4°C overnight with constant shaking. Concentration of the primary  
22 antibody used were as follows: Phospho P-70 (Thr389)-S6K (CST: 9205S, 1:1000 in  
23 5% BSA in TBST), P-70 S6K (CST: 9202S, 1:1000 in 5% milk in TBST),  
24 Phospho(Ser65)-4EBP1 (CST: 9451, 1:1000 in 5% BSA in TBST), 4EBP1(CST: 9452,  
25 1:1000 in 5% milk in TBST), GAPDH (Sigma: G9545, 1:10,000 in 5% milk in TBST).  
26 The next day, blots were washed with TBST (3X5 min) and incubated with respective  
27 species specific HRP secondary antibodies (concentration of 1:10,000 was used for  
28 all secondary antibodies) for 1hour at room temperature. Blots were washed again as  
29 before with TBST and developed using ECL western blotting substrate.

30

#### 31 *Statistical analysis*

32 The statistical analysis of endolysosome volume, number and normalized NND was  
33 performed with R (3.6.0). For NND analysis, the centroids distance between structures  
34 was calculated from a constant number of endolysosomes that was randomly sampled  
35 from each cell. The statistical analysis was based on the Kruskal-Wallis test with Dunn  
36 post-hoc test with Sidak correction for multiple comparisons correction.

37 For all experiment, a large number of cells were monitored from 3 to 6 independent

1 experiments. Two-sided Student t-tests were performed on averages to assess the  
2 significance of difference. To compare the fraction of non-invasive spheroids a logrank  
3 (Matel-Cox) test was performed in Prism software. Additionally, to compare the global  
4 distribution of cell population,  $\chi^2$  tests were performed (R function “chi-square()<sup>2</sup>”). In  
5 this case, results from independent experiments were individually compared and  
6 combined for representation and statistical analysis.

## 9 **Acknowledgements**

10 We greatly acknowledge Lucas Kapitein (Utrecht University, The Netherlands) for  
11 FRBP/FRB system, Danijela Vignjevic (Institut Curie, France) and her team for help  
12 with invasion assays. We thank Jannifer Southgate (University of York, UK) for her gift  
13 of NHU cell extracts and Clémentine Krucker (Institut Curie) and Yann Neuzillet (Foch  
14 Hospital, France) for deriving these cells. We thank Elodie Chapeaublanc for help on  
15 the bioinformatics analysis. The authors greatly acknowledge the Cell and Tissue  
16 Imaging Facility (PICT-IBiSA @Burg and @Pasteur) and the Nikon Imaging Center at  
17 Institut Curie (Paris) that are member of the French National Research Infrastructure  
18 France-BioImaging (ANR10-INBS-04). This project was supported by grants from the  
19 European Union’s Horizon 2020 research and innovation programme under the Marie  
20 Skłodowska-Curie grant agreement No 666003 to PM; Capes/ Ciência sem Fronteiras/  
21 Process (9121137) to CDBS; Grants from Fondation ARC pour la recherche sur le  
22 cancer to KS and HL, Institut Curie SIRIC grant to KS, Agence Nationale de la  
23 Recherche (#2010 BLAN 122902), the ITMO Nanotumor grant to KS, the Centre  
24 National de la Recherche Scientifique and Institut Curie. The Goud team is member of  
25 Labex CelTisPhyBio (11-LBX-0038) and Idex Paris Sciences et Lettres (ANR-10-  
26 IDEX-0001-02 PSL). The Molecular Oncology team (FR) is supported by La Ligue  
27 Contre le Cancer (Equipe labellisée program). The authors declare no conflict of  
28 interest.

## 30 **References**

- 31
- 32 Antoni, S., Ferlay, J., Soerjomataram, I., Znaor, A., Jemal, A., and Bray, F. (2017).  
33 Bladder Cancer Incidence and Mortality: A Global Overview and Recent Trends. *Eur.*  
34 *Urol.* *71*, 96–108.
- 35 Ballabio, A., and Bonifacino, J.S. (2020). Lysosomes as dynamic regulators of cell and  
36 organismal homeostasis. *Nat. Rev. Mol. Cell Biol.* *21*, 101–118.

- 1 Bar-Peled, L., Chantranupong, L., Cherniack, A.D., Chen, W.W., Ottina, K.A.,  
2 Grabiner, B.C., Spear, E.D., Carter, S.L., Meyerson, M., and Sabatini, D.M. (2013). A  
3 Tumor Suppressor Complex with GAP Activity for the Rag GTPases That Signal  
4 Amino Acid Sufficiency to mTORC1. *Science* 340, 1100–1106.
- 5 van Bergeijk, P., Adrian, M., Hoogenraad, C.C., and Kapitein, L.C. (2015).  
6 Optogenetic control of organelle transport and positioning. *Nature* 518, 111–114.
- 7 Biton, A., Bernard-Pierrot, I., Lou, Y., Krucker, C., Chapeaublanc, E., Rubio-Pérez,  
8 C., López-Bigas, N., Kamoun, A., Neuzillet, Y., Gestraud, P., et al. (2014).  
9 Independent Component Analysis Uncovers the Landscape of the Bladder Tumor  
10 Transcriptome and Reveals Insights into Luminal and Basal Subtypes. *Cell Rep.* 9,  
11 1235–1245.
- 12 Calcagni, A., Kors, L., Verschuren, E., De Cegli, R., Zampelli, N., Nusco, E.,  
13 Confalonieri, S., Bertalot, G., Pece, S., Settembre, C., et al. (2016). Modelling TFE  
14 renal cell carcinoma in mice reveals a critical role of WNT signaling. *ELife* 5.
- 15 Castro-Castro, A., Marchesin, V., Monteiro, P., Lodillinsky, C., Rossé, C., and  
16 Chavier, P. (2016). Cellular and Molecular Mechanisms of MT1-MMP-Dependent  
17 Cancer Cell Invasion. *Annu. Rev. Cell Dev. Biol.* 32, 555–576.
- 18 Choo, A.Y., and Blenis, J. (2009). Not all substrates are treated equally: Implications  
19 for mTOR, rapamycin-resistance, and cancer therapy. *Cell Cycle* 8, 567–572.
- 20 Di Malta, C., Siciliano, D., Calcagni, A., Monfregola, J., Punzi, S., Pastore, N.,  
21 Eastes, A.N., Davis, O., De Cegli, R., Zampelli, A., et al. (2017). Transcriptional  
22 activation of RagD GTPase controls mTORC1 and promotes cancer growth. *Science*  
23 356, 1188–1192.
- 24 Dumont, F.J., and Su, Q. (1995). Mechanism of action of the immunosuppressant  
25 rapamycin. *Life Sci.* 58, 373–395.
- 26 Dykes, S.S., Gray, A.L., Coleman, D.T., Saxena, M., Stephens, C.A., Carroll, J.L.,  
27 Pruitt, K., and Cardelli, J.A. (2016). The Arf-like GTPase Arl8b is essential for three-  
28 dimensional invasive growth of prostate cancer *in vitro* and xenograft formation and  
29 growth *in vivo*. *Oncotarget* 7, 31037–31052.
- 30 Hämälistö, S., and Jäättelä, M. (2016). Lysosomes in cancer—living on the edge (of  
31 the cell). *Curr. Opin. Cell Biol.* 39, 69–76.
- 32 Hyenne, V., Lefebvre, O., and Goetz, J.G. (2017). Going live with tumor exosomes  
33 and microvesicles. *Cell Adhes. Migr.* 11, 173–186.
- 34 Korolchuk, V.I., Saiki, S., Lichtenberg, M., Siddiqi, F.H., Roberts, E.A., Imarisio, S.,  
35 Jahreiss, L., Sarkar, S., Futter, M., Menzies, F.M., et al. (2011). Lysosomal  
36 positioning coordinates cellular nutrient responses. *Nat. Cell Biol.* 13, 453–460.
- 37 Lawrence, R.E., and Zoncu, R. (2019). The lysosome as a cellular centre for  
38 signalling, metabolism and quality control. *Nat. Cell Biol.* 21, 133–142.
- 39 Liu, Q., Chang, J.W., Wang, J., Kang, S.A., Thoreen, C.C., Markhard, A., Hur, W.,  
40 Zhang, J., Sim, T., Sabatini, D.M., et al. (2010). Discovery of 1-(4-(4-  
41 Propionylpiperazin-1-yl)-3-(trifluoromethyl)phenyl)-9-(quinolin-3-  
42 yl)benzo[h][1,6]naphthyridin-2(1*H*)-one as a Highly Potent, Selective Mammalian

- 1 Target of Rapamycin (mTOR) Inhibitor for the Treatment of Cancer. *J. Med. Chem.*  
2 53, 7146–7155.
- 3 Perera, R.M., and Zoncu, R. (2016). The Lysosome as a Regulatory Hub. *Annu. Rev.*  
4 *Cell Dev. Biol.* 32, 223–253.
- 5 Perera, R.M., Stoykova, S., Nicolay, B.N., Ross, K.N., Fitamant, J., Boukhali, M.,  
6 Lengrand, J., Deshpande, V., Selig, M.K., Ferrone, C.R., et al. (2015).  
7 Transcriptional control of autophagy–lysosome function drives pancreatic cancer  
8 metabolism. *Nature* 524, 361–365.
- 9 Perera, R.M., Di Malta, C., and Ballabio, A. (2019). MiT/TFE Family of Transcription  
10 Factors, Lysosomes, and Cancer. *Annu. Rev. Cancer Biol.* 3, 203–222.
- 11 Pu, J., Guardia, C.M., Keren-Kaplan, T., and Bonifacino, J.S. (2016). Mechanisms  
12 and functions of lysosome positioning. *J. Cell Sci.* 129, 4329–4339.
- 13 Schauer, K., Duong, T., Bleakley, K., Bardin, S., Bornens, M., and Goud, B. (2010).  
14 Probabilistic density maps to study global endomembrane organization. *Nat.*  
15 *Methods* 7, 560–566.
- 16 Steffan, J.J., Dykes, S.S., Coleman, D.T., Adams, L.K., Rogers, D., Carroll, J.L.,  
17 Williams, B.J., and Cardelli, J.A. (2014). Supporting a role for the GTPase Rab7 in  
18 prostate cancer progression. *PLoS One* 9, e87882.
- 19 Thelen, A.M., and Zoncu, R. (2017). Emerging Roles for the Lysosome in Lipid  
20 Metabolism. *Trends Cell Biol.* 27, 833–850.
- 21 Walton, Z.E., Brooks, R.C., and Dang, C.V. (2019). mTOR Senses Intracellular pH  
22 through Lysosome Dispersion from RHEB. *BioEssays* 41, 1800265.
- 23 Zhang, T., Guo, J., Li, H., and Wang, J. (2017). Meta-analysis of the prognostic value  
24 of p-4EBP1 in human malignancies. *Oncotarget* 9, 2761–2769.
- 25
- 26



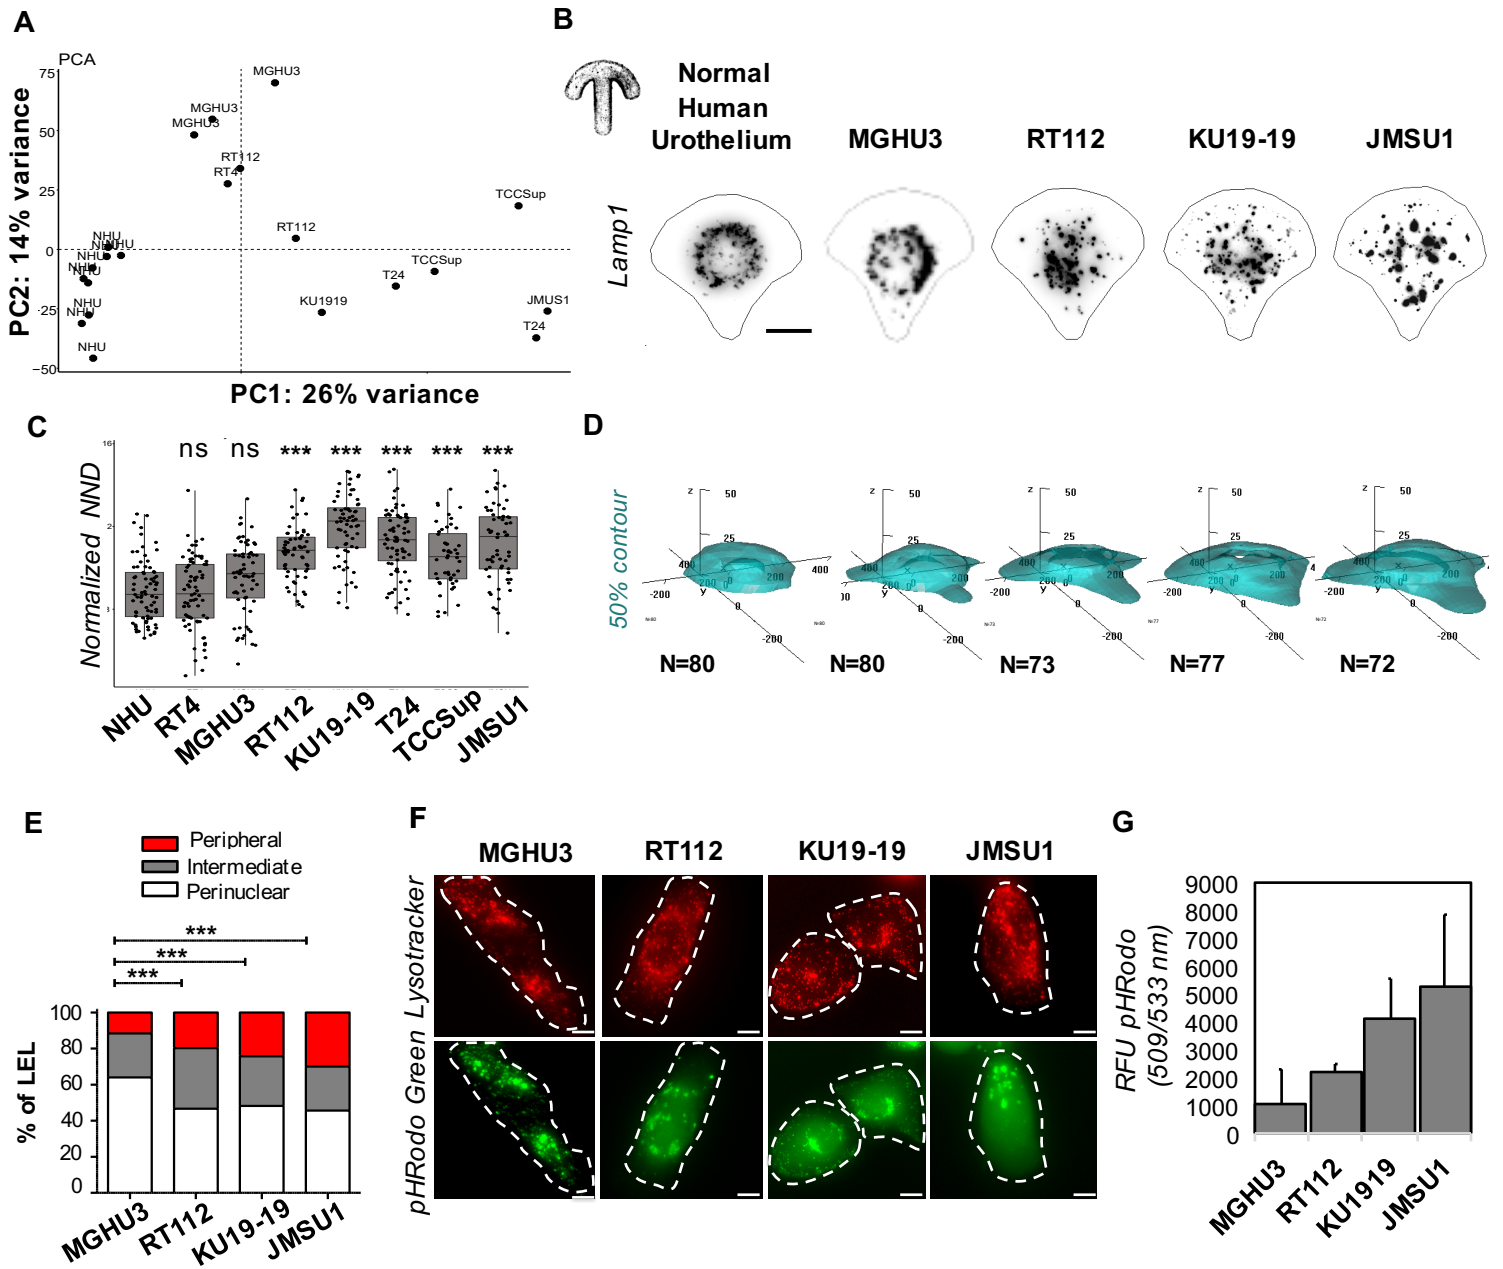

Figure 1

1 **Figure 1. High-grade cancer cell lines are specifically characterized by scattered,**  
2 **peripheral positioning of endolysosomes**

3 A. Principal component analysis of transcriptome data of normal human urothelium  
4 (NHU) cells and the bladder cancer cell lines RT4 (ATCC® HTB-2™), MGHU3 (Lin et  
5 al., 1985), RT112 (Marshall et al., 1977), KU19-19 (Tachibana et al., 1997), T24  
6 (n=72), TCCSup (Nayak et al., 1977), JMSU1 (Morita et al., 1995). B. Representative  
7 images of endolysosomes visualized by immunofluorescence staining against the  
8 lysosomal-associated membrane protein 1 (LAMP-1, CD107a) in NHU, MGHU3,  
9 RT112, KU19-19 and JMSU1 single cells cultured on crossbow-shaped adhesive  
10 micropatterns for better comparison. Scale bar is 10  $\mu$ m. C. Distribution of nearest  
11 neighbor distance (NND) between endolysosomes in NHU (n=80), RT4 (n=73),  
12 MGHU3 (n=80), RT112 (n=64), KU19-19 (n=77), T24 (n=72), TCCSup (n=48) and  
13 JMSU1 (n=72). Adjusted p-values of testing against NHU condition are RT4: 0.9999,  
14 MGHU3: 0.1501; RT112: <0.0001; KU19-19: <0.0001; T24: <0.0001; TCCsup:  
15 <0.0001; JMSU1 : <0.0001 in a Kruskal-Wallis test with Dunn post-hoc test with Sidak  
16 correction for multiple comparisons. ns p >0.01 and \*\*\* p < 0.0001. D. 3D probabilistic  
17 density maps of endolysosomes in NHU (n=80), MGHU3 (n=80), RT112 (n=64), KU19-  
18 19 (n=77) and JMSU1 (n=72). The 50% contour visualizes the smallest cellular volume  
19 containing 50% of endolysosomes. E. Endolysosome distribution in classical cell  
20 culture conditions, classified into peripheral (red), intermediate (grey) and perinuclear  
21 (white) positioning based on their relative positioning between the nucleus and plasma  
22 membrane for n>60 cells per cell line analyzed (see also Supplementary Figure 1G),  
23 \*\*\* p < 0.001 in a  $\chi^2$  test. F. Representative images of endolysosomes visualized by  
24 lysoTracker (red) and intracellular pH sensor pHrodo-green (green) in MGHU3,  
25 RT112, KU19-19 and JMSU1. Scale bar is 5  $\mu$ m. G. Quantification of pH sensor  
26 pHrodo-green (in relative fluorescence units emission at 509/533 nm) in MGHU3,  
27 RT112, KU19-19 and JMSU1, error bars represent s.d. of three independent  
28 experiments.

29  
30  
31



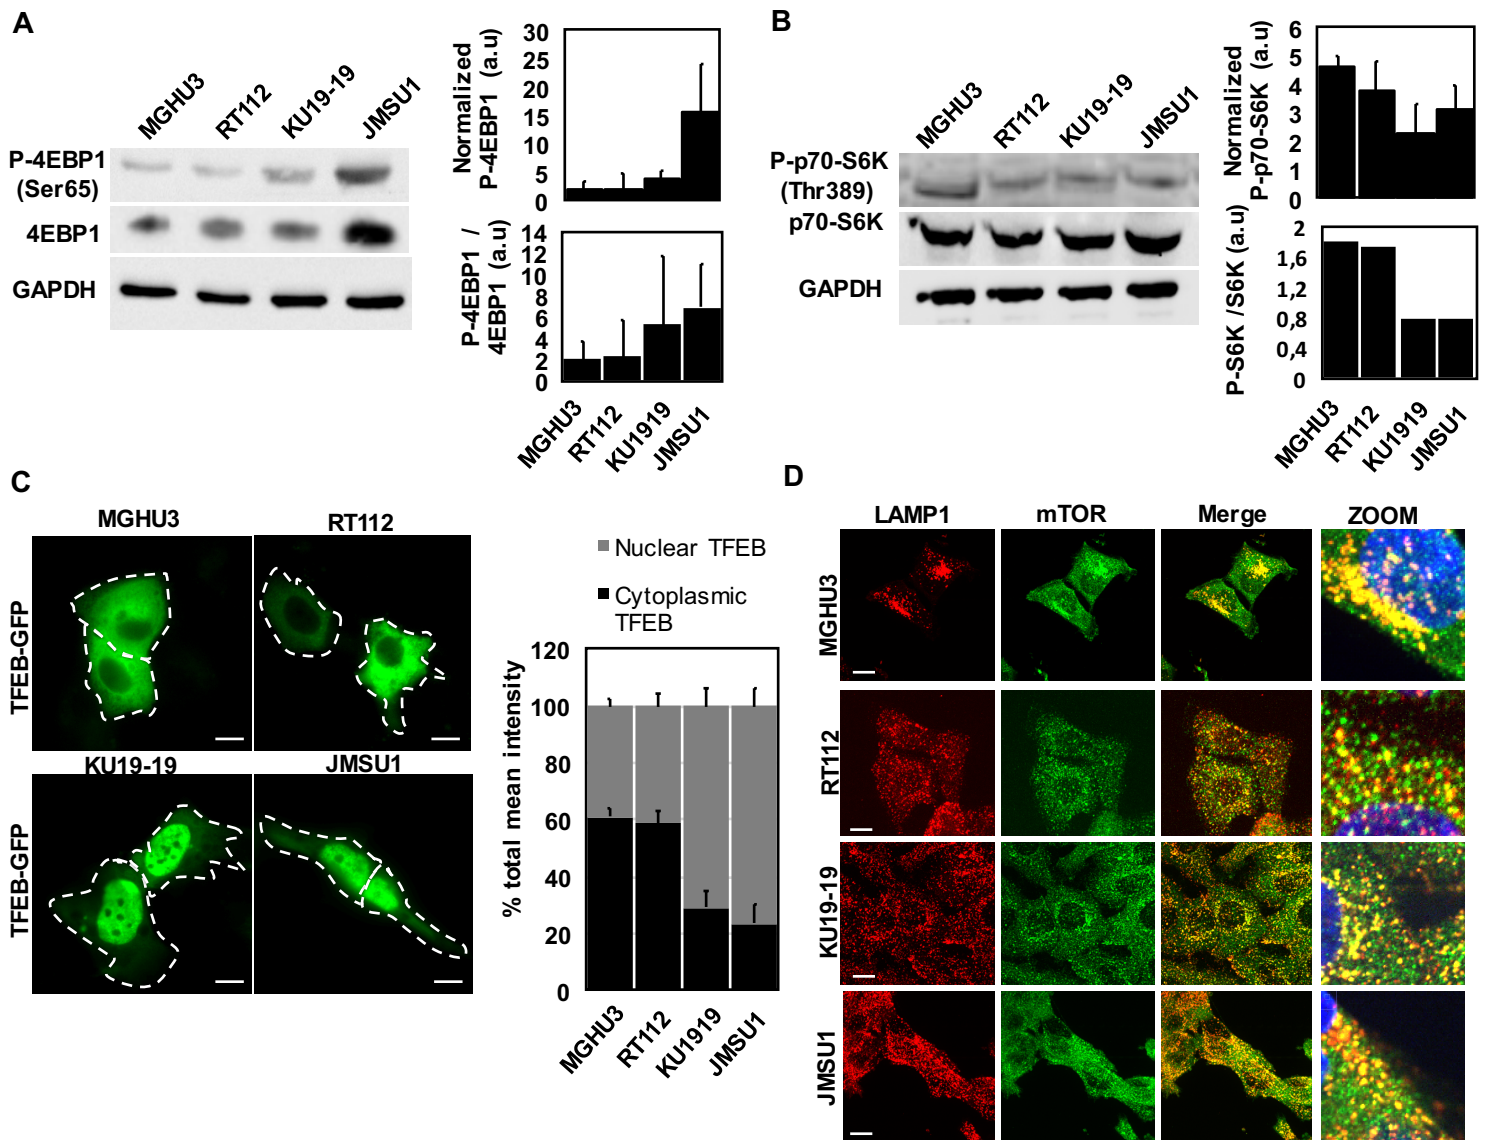

Figure 2

1 **Figure 2. Altered endolysosomes reveal changes in mTORC1 substrates in**  
2 **cancer progression**

3 A. Western Blot analysis of eIF4E Binding Protein (4EBP1) phosphorylation (P-4EBP1  
4 Ser65) in MGHU3, RT112, KU19-19 and JMSU1 and quantification of relative  
5 phosphorylated P-4EBP1 to GAPDH and total 4EBP1 protein levels. Error bars show  
6 s.d. of three independent experiments. B. Western Blot analysis of p70-S6 Kinase 1  
7 (S6K1) phosphorylation (P-p70-S6K Thr389) in MGHU3, RT112, KU19-19 and JMSU1  
8 and quantification of relative phosphorylated P-4EBP1 to GAPDH and total S6K1  
9 protein levels. Error bars show s.d. of three independent experiments. C.  
10 Representative images of MGHU3, RT112, KU19-19 and JMSU1 cells transfected with  
11 TFEB-GFP (green) for 48h and quantification of relative fluorescent intensity between  
12 nucleus (grey) and cytoplasm (black). Scale bars are 10  $\mu$ m. Error bars show s.d. of  
13 three independent experiments. D. Representative images of endolysosomes  
14 visualized by immunofluorescence staining against the lysosomal-associated  
15 membrane protein 1 (LAMP-1, CD107a) and mTORC1 visualized by  
16 immunofluorescence staining against mTOR in MGHU3, RT112, KU19-19 and  
17 JMSU1. The zoom shows the merged image of both proteins. Scale bars are 10  $\mu$ m.  
18  
19

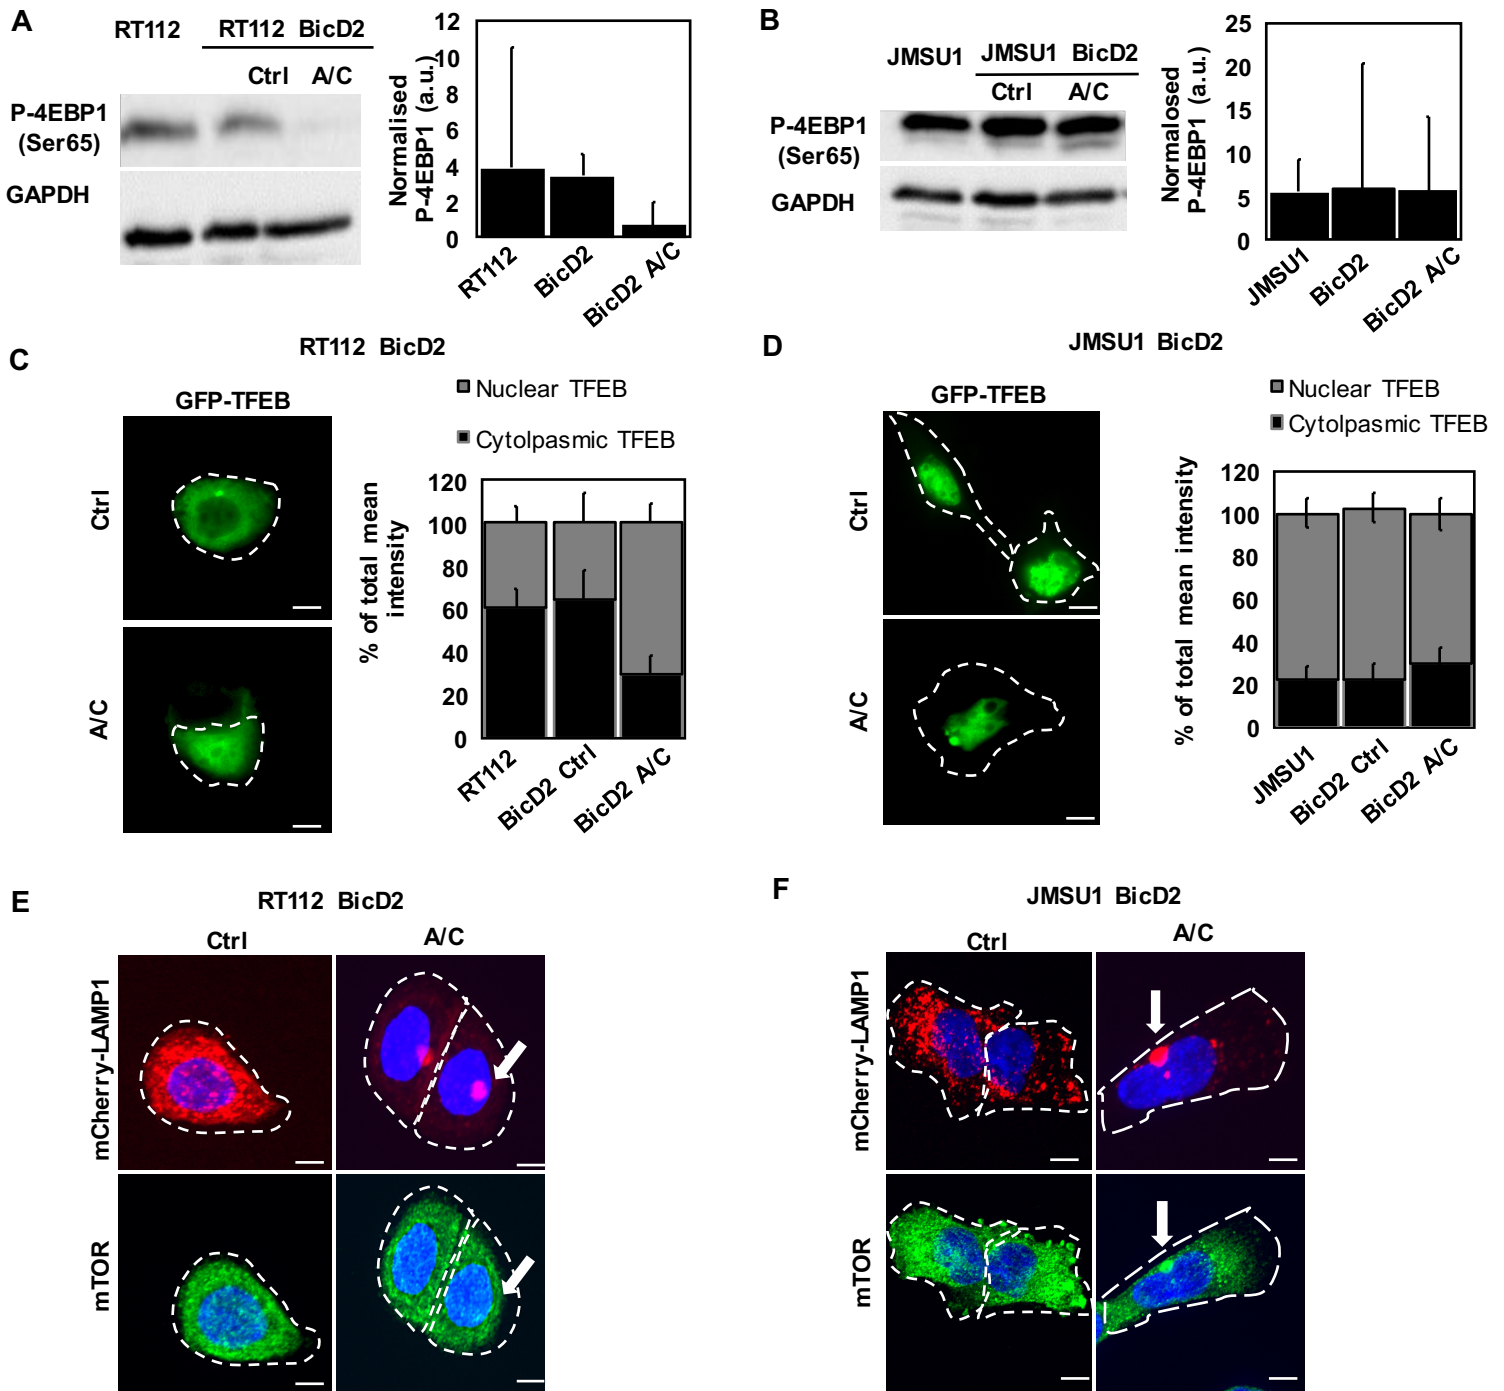

Figure 3

1 **Figure 3. mTORC1 signaling does not respond to endolysosomes positioning**  
2 **changes in high-grade bladder cancer cell line**

3 A. Western Blot analysis of eIF4E Binding Protein (4EBP1) phosphorylation (P-4EBP1  
4 Ser65) in RT112 cells stably expressing FKBP-fused to Lamp1-mCherry and FRB-  
5 fused to the dynein adopter BicD2 (RT112 BicD2, see also Supplementary Figure 3A)  
6 in control condition (DMSO, Ctrl) and after addition of A/C heterodimerizer (A/C) and  
7 quantification of relative phosphorylated P-4EBP1 to GAPDH levels. Error bars show  
8 s.d. of three independent experiments. B. Western Blot analysis of eIF4E Binding  
9 Protein (4EBP1) phosphorylation (P-4EBP1 Ser65) in JMSU1 cells stably expressing  
10 FKBP-fused to Lamp1-mCherry and FRB-fused to the dynein adopter BicD2 (JMSU1  
11 BicD2) in control condition (DMSO, Ctrl) and after addition of A/C heterodimerizer  
12 (A/C) and quantification of relative phosphorylated P-4EBP1 to GAPDH levels. Error  
13 bars show s.d. of three independent experiments. C. Representative images of RT112  
14 BicD2 cells transfected with TFEB-GFP (green) for 48h in control condition (DMSO,  
15 Ctrl) and after addition of A/C heterodimerizer (A/C) and quantification of relative  
16 fluorescent intensity between nucleus (grey) and cytoplasm (black). Scale bars are 10  
17  $\mu\text{m}$ . Error bars show s.d. of three independent experiments. D. Representative images  
18 of JMSU1 BicD2 cells transfected with TFEB-GFP (green) for 48h in control condition  
19 (DMSO, Ctrl) and after addition of A/C heterodimerizer (A/C) and quantification of  
20 relative fluorescent intensity between nucleus (grey) and cytoplasm (black). Scale bars  
21 are 10  $\mu\text{m}$ . Error bars show s.d. of three independent experiments. E. Representative  
22 images of mCherry-LAMP1 endolysosomes and mTORC1 visualized by  
23 immunofluorescence staining in RT112 BicD2 cells in control condition (DMSO, Ctrl)  
24 and after addition of A/C heterodimerizer (A/C). Scale bars are 5  $\mu\text{m}$ . F. Representative  
25 images of mCherry-LAMP1 endolysosomes and mTORC1 visualized by  
26 immunofluorescence staining in JMSU1 BicD2 cells in control condition (DMSO, Ctrl)  
27 and after addition of A/C heterodimerizer (A/C). Scale bars are 5  $\mu\text{m}$ .

28  
29

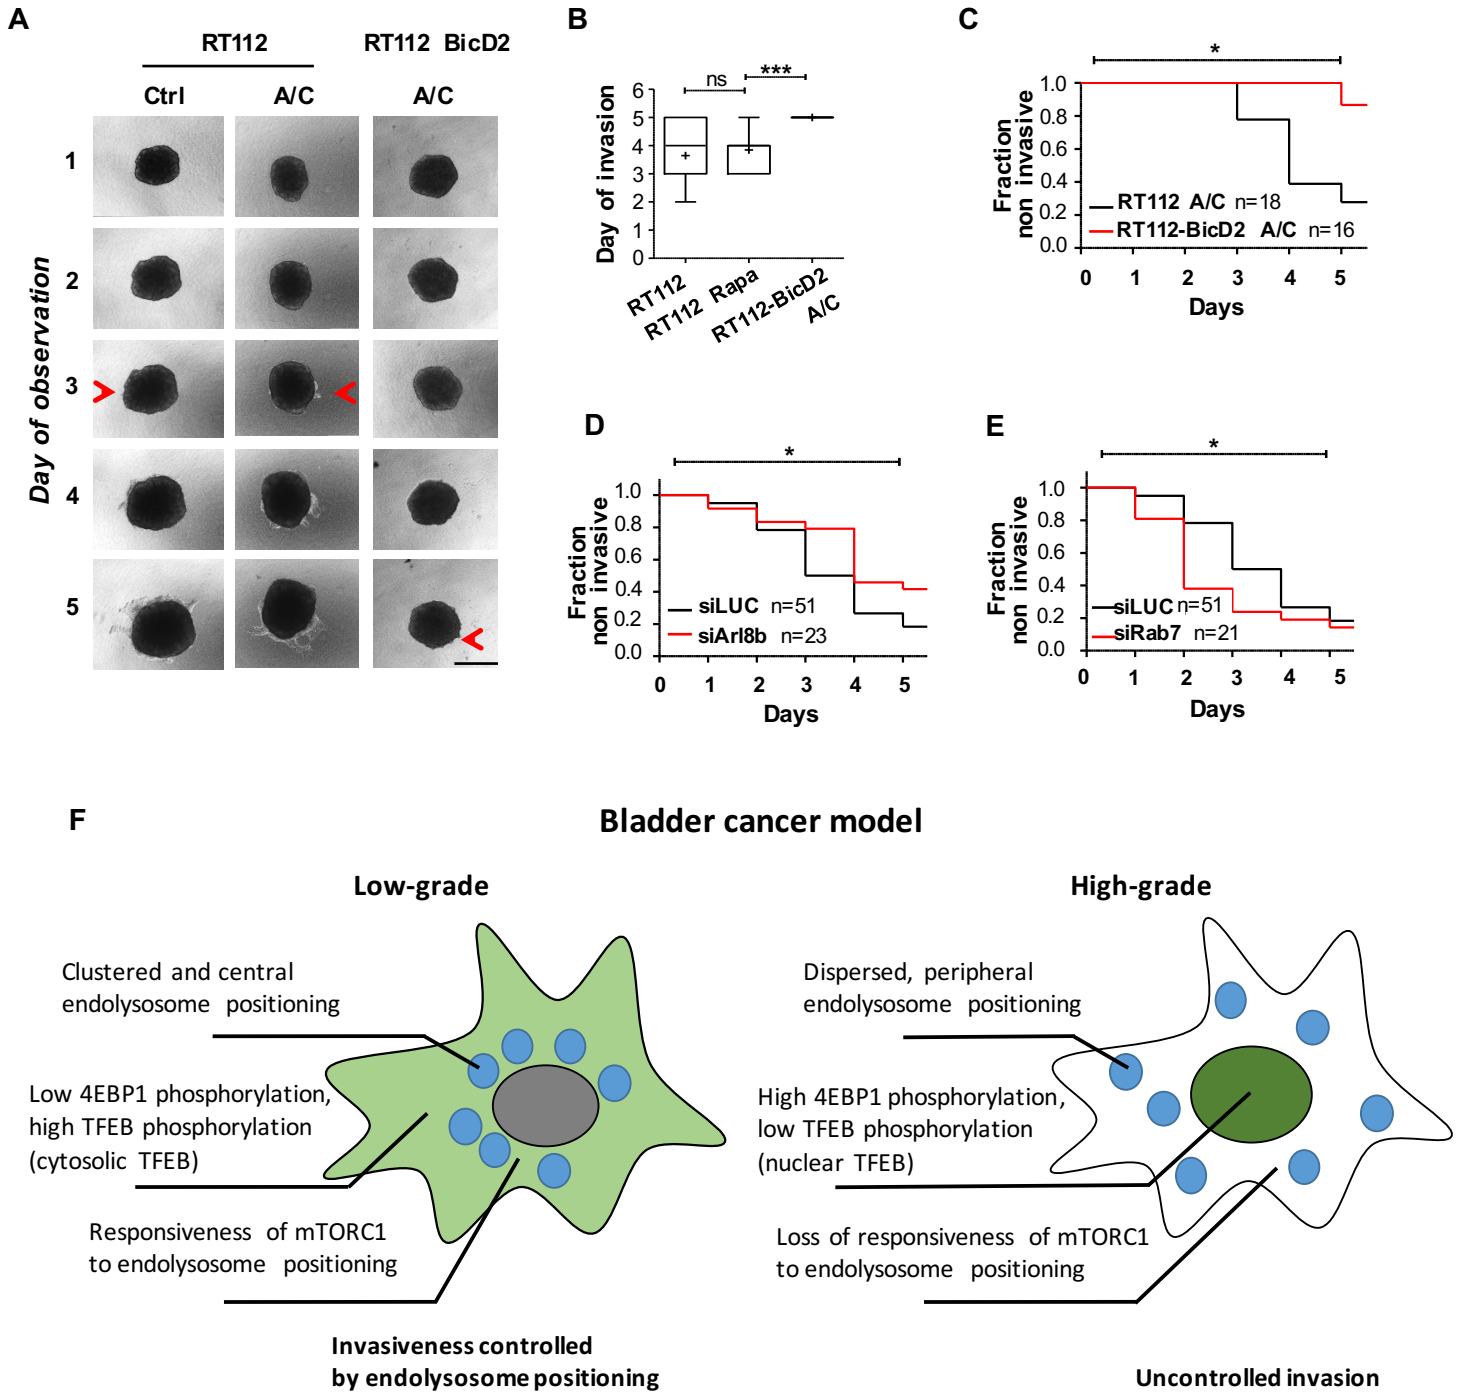

*Figure 4*

1 **Figure 4. Endolysosome positioning regulates invasion of bladder cancer cell**  
2 **lines**

3 A. 3D invasion of RT112 and RT112 BicD2 spheroids into collagen I matrix in the  
4 presence or absence of A/C heterodimerizer (A/C). Red arrows represent invading  
5 cells. Scale bar is 0.5 mm. B. Average day of invasion of RT112 and RT112 BicD2  
6 spheroids in the presence or absence of A/C heterodimerizer (A/C). \*\*\*  $p < 0.001$  in a  
7 student t-test. C. Invasion rate of RT112 (black, n=18) and RT112 BicD2 (red, n=16)  
8 spheroids in the presence of A/C heterodimerizer as a function of the time (observed  
9 at the interval of 1d). \*  $p < 0.05$  in a logrank test. D. Invasion rate of RT112 siLUC  
10 (black, n=51) and RT112 siArf8b (red, n=23) spheroids as a function of the time  
11 (observed at the interval of 1d). \*  $p < 0.05$  in a logrank test. E. Invasion rate of RT112  
12 siLUC (black, n=51) and RT112 siRab7 (red, n=21) spheroids as a function of the time  
13 (observed at the interval of 1d). \*  $p < 0.05$  in a logrank test. F. Schematic representation  
14 of endolysosome dysfunction in the bladder cancer model: changes of the  
15 endolysosome compartment at different steps of cancer disease reveal intricate spatial  
16 and temporal dimensions of tumorigenesis. Endolysosomes are represented as blue  
17 circles, TFEB localization is represented by green color either in the cytosol or nucleus.

18  
19  
20  
21

1 **Supplementary Figure 1:**

2 A. Average intensity projections of the actin cytoskeleton visualized by phalloidin of n  
3 cells of normal human urothelium (NHU) and bladder cancer cell lines RT4 (ATCC®  
4 HTB-2™), MGHU3 (Lin et al., 1985), RT112 (Marshall et al., 1977), KU19-19  
5 (Tachibana et al., 1997), T24 (n=72), TCCSup (Nayak et al., 1977), JMSU1 (Morita et  
6 al., 1995). B. Distribution of the average volume of endolysosomes in NHU (n=80),  
7 RT4 (n=73), MGHU3 (n=80), RT112 (n=64), KU19-19 (n=77), T24 (n=72), TCCSup  
8 (n=48) and JMSU1 (n=72). Adjusted p-values of testing against NHU condition are  
9 RT4: 0.2475; MGHU3: <0.0001; RT112: 0.0095; KU19-19: 0.0220; T24: 0.9957;  
10 TCCsup: 0.0006; JMSU1: <0.0001 in a Kruskal-Wallis test with Dunn post-hoc test  
11 with Sidak correction for multiple comparisons. ns p > 0.01, \* p < 0.01, \*\* p < 0.001  
12 and \*\*\* p < 0.0001. C. Distribution of the average numbers of endolysosomes per cell  
13 in NHU (n=80), RT4 (n=73), MGHU3 (n=80), RT112 (n=64), KU19-19 (n=77), T24  
14 (n=72), TCCSup (n=48) and JMSU1 (n=72). Adjusted p-values of testing against NHU  
15 condition are RT4: <0.0001; MGHU3: <0.0001; RT112: 0.9997; KU19-19: 0.8379; T24:  
16 0.8755; TCCsup: 0.3407; JMSU1: <0.0001 in a Kruskal-Wallis test with Dunn post-hoc  
17 test with Sidak correction for multiple comparisons correction. ns p > 0.01 and \*\*\* p <  
18 0.0001. D. Correlation analysis between average endolysosomal volume and average  
19 numbers per cell shows a weak ( $R^2=0.19$ ) but significant association (p-value < 0.001  
20 in a t-test for correlation). E. Average day of invasion of MGHU3, RT112, KU19-19,  
21 and JMSU1 in invasion assays from 3D spheroids into collagen matrix, and  
22 representative images of 3D spheroids from KU19-19 (upper panel) and JMSU1 (lower  
23 panel) at 1 day after matrix embedding. White arrow indicates invasion of collagen  
24 matrix by escaping cells. F. Average nucleus size of NHU (n=80), MGHU3 (n=80),  
25 RT112 (n=64), KU19-19 (n=77) and JMSU1 (n=72) cells; \*\*\* p < 0.0001 in a  $\chi^2$  test. G.  
26 Schematic representation of the classification analysis of endolysosome distribution in  
27 classical cell culture conditions, based on their relative positioning between the  
28 nucleus and plasma membrane as quantified in Figure 1E.

29

30 **Supplementary Figure 2:**

31 A. Western Blot analysis of eIF4E Binding Protein (4EBP1) phosphorylation (P-4EBP1  
32 Ser65) and p70-S6 Kinase 1 (S6K1) phosphorylation (P-p70-S6K Thr389) in MGHU3,  
33 RT112, KU19-19 and JMSU1 in control conditions (full media) and after treatment with  
34 Wortmannin at 1 $\mu$ M for 2 h. B. Western Blot analysis of 4EBP1 and S6K  
35 phosphorylation in MGHU3, RT112, KU19-19 and JMSU1 in control conditions (full  
36 media) and after treatment with Rapamycin at 20 $\mu$ M for 2 h. C. Western Blot analysis  
37 of 4EBP1 and S6K phosphorylation in MGHU3, RT112, KU19-19 and JMSU1 in

1 control conditions (full media) and after treatment with Torin at 1 $\mu$ M for 2 h. D. Western  
2 Blot analysis of 4EBP1 and S6K phosphorylation in MGHU3, RT112, KU19-19 and  
3 JMSU1 in control conditions (full media) and after starvation in EBSS for 4h. E.  
4 Representative images of MGHU3, RT112, KU19-19 and JMSU1 cells transfected with  
5 TFEB-GFP (green) for 48h and treated with Rapamycin at 20 $\mu$ M for 2 h. Scale bars  
6 are 5  $\mu$ m.

7

8 **Supplementary Figure 3:**

9 A. Schematic representation of the FKBP/FRB heterodimerization system that allows  
10 dynein recruitment on endolysosomes induced by A/C heterodimerizer addition  
11 according to (van Bergeijk et al., 2015). RT112 and JMSU1 cells were engineered to  
12 stably express FKBP-fused to Lamp1-mCherry and FRB-fused to the dynein adopter  
13 BicD2 to move endolysosomes to the cell center upon A/C heterodimerizer addition.  
14 B. Representative images of endolysosomes visualized by mCherry-LAMP1 in RT112  
15 BicD2 single cells cultured on crossbow-shaped adhesive micropatterns in control  
16 condition (DMSO, Ctrl) and after addition of A/C heterodimerizer (A/C). Scale bar is 10  
17  $\mu$ m. Right panel shows corresponding 3D probabilistic density maps of endolysosomes  
18 in control condition (grey) and after addition of A/C heterodimerizer (cyan) for N>60 for  
19 each condition. The 50% contour visualizes the smallest cellular volume containing  
20 50% of endolysosomes. C Western Blot analysis of Rab7 and Arl8b in RT112 and  
21 JMSU1 cells in control condition (siLUC) and upon targeting Rab7 (siRab7) or Arl8b  
22 (siArl8b) D. Representative images of endolysosomes visualized by  
23 immunofluorescence staining against the lysosomal-associated membrane protein 1  
24 (LAMP-1, CD107a) in RT112 single cells cultured on crossbow-shaped adhesive  
25 micropatterns in control condition (siLUC) and upon targeting Rab7 (siRab7) or Arl8b  
26 (siArl8b). Scale bar is 10  $\mu$ m E. Western Blot analysis of eIF4E Binding Protein  
27 (4EBP1) phosphorylation (P-4EBP1 Ser65) in RT112 cells in control condition (siLUC)  
28 and upon targeting of Rab7 (siRab7) or Arl8b (siArl8b) and quantification of relative  
29 phosphorylated P-4EBP1 to GAPDH levels. F. Western Blot analysis of eIF4E Binding  
30 Protein (4EBP1) phosphorylation (P-4EBP1 Ser65) in JMSU1 cells in control condition  
31 (siLUC) and upon targeting of Rab7 (siRab7) or Arl8b (siArl8b) and quantification of  
32 relative phosphorylated P-4EBP1 to GAPDH levels.

33

34 **Supplementary Figure 4:**

35 A. Representative images of endolysosomes visualized by immunofluorescence  
36 staining against the lysosomal-associated membrane protein 1 (LAMP-1, CD107a) in



1 RT112 single cells cultured on crossbow-shaped adhesive micropatterns in control  
2 condition (DMSO) and in the presence of A/C heterodimerizer (A/C). B. Invasion rate  
3 of RT112 spheroids in the absence (black, n=18) and presence (red, n=16) of A/C  
4 heterodimerizer as a function of the time (observed at the interval of 1d). n.s. in a  
5 logrank test. C. 3D invasion of RT112 spheroids into collagen I matrix in control  
6 conditions (siLUC) or after siRNA targeting of Arl8b (siArl8b) or Rab7 (siRab7). Red  
7 arrows represent invading cells. Scale bar is 0.5 mm. D. 3D invasion of JMSU1 and  
8 JMSU1 BicD2 spheroids into collagen I matrix in the presence or absence of A/C  
9 heterodimerizer (A/C) observed at 3h interval. Scale bar is 0.5 mm.

10

### 11 **Supplementary References:**

12 Bubeník, J., Barešová, M., Viklický, V., Jakoubková, J., Sainerová, H., and Donner,  
13 J. (1973). Established cell line of urinary bladder carcinoma (T24) containing tumour-  
14 specific antigen. *Int. J. Cancer* 11, 765–773.

15 Lin, C.-W., Lin, J.C., and Prout, G.R. (1985). Establishment and Characterization of  
16 Four Human Bladder Tumor Cell Lines and Sublines with Different Degrees of  
17 Malignancy. *Cancer Res.* 45, 5070–5079.

18 Nayak, S.K., O'Toole, C., and Price, Z.H. (1977). A cell line from an anaplastic  
19 transitional cell carcinoma of human urinary bladder. *Br. J. Cancer* 35, 142–151.

20 Marshall, C.J., Franks, L.M., and Carbonell, A.W. (1977). Markers of Neoplastic  
21 Transformation in Epithelial Cell Lines Derived From Human Carcinomas. *JNCI J.*  
22 *Natl. Cancer Inst.* 58, 1743–1751.

23 Morita, T., Shimohara, N., Honma, M., and Tokue, A. (1995). Establishment and  
24 characterization of a new cell line from human bladder cancer (JMSU1). *Urol. Res.*  
25 23, 143–149.

26 Southgate J, Hutton KA, Thomas DF, Trejdosiewicz LK. Normal human urothelial  
27 cells in vitro: proliferation and induction of stratification. *Lab Invest.* 1994;71(4):583–  
28 594.

29 Southgate J, Masters JR, Trejdosiewicz LK. Culture of Human Urothelium. In:  
30 Freshney RI, Freshney MG, editors. *Culture of Epithelial Cells*. New York, NY: J  
31 Wiley and Sons; 2002. pp. 381–400.

32 Tachibana M, Miyakawa A, Nakashima J, Murai M, Nakamura K, Kubo A, Hata JI.  
33 Constitutive production of multiple cytokines and a human chorionic gonadotrophin  
34 beta-subunit by a human bladder cancer cell line (KU-19-19): possible demonstration  
35 of totipotential differentiation. *Br J Cancer.* 1997;76(2):163-74.

36

**A**  
Average Intensity Projection of Phalloidin

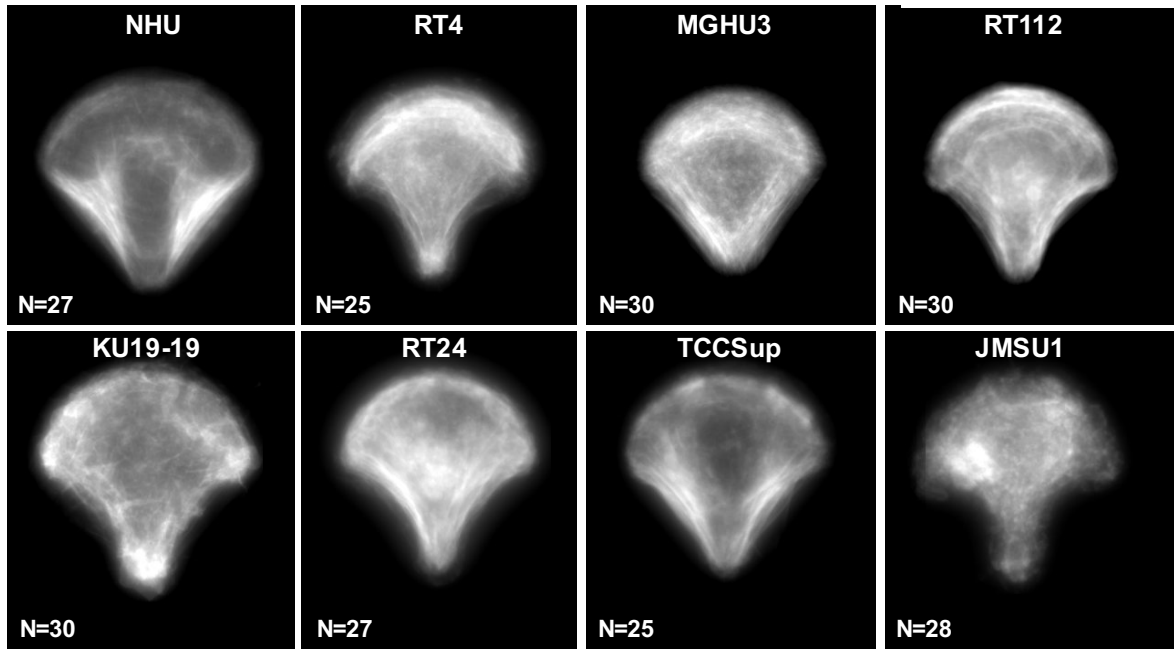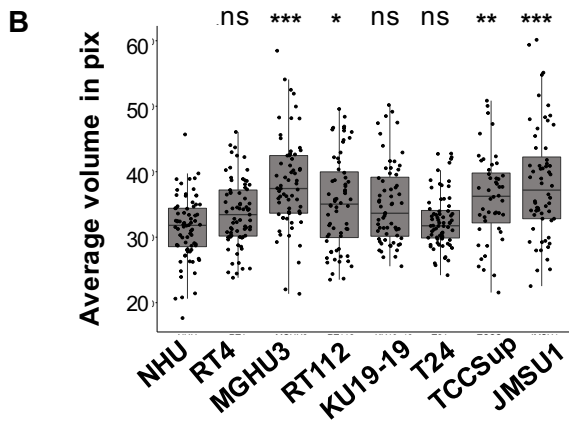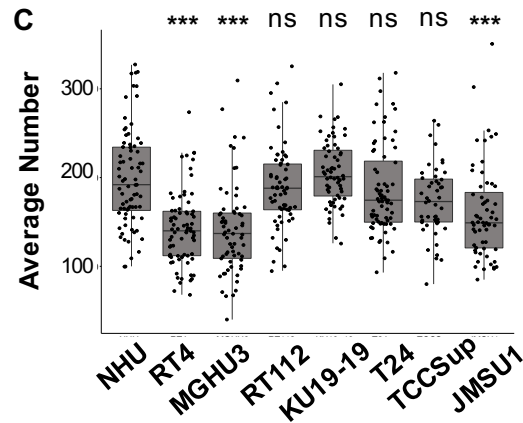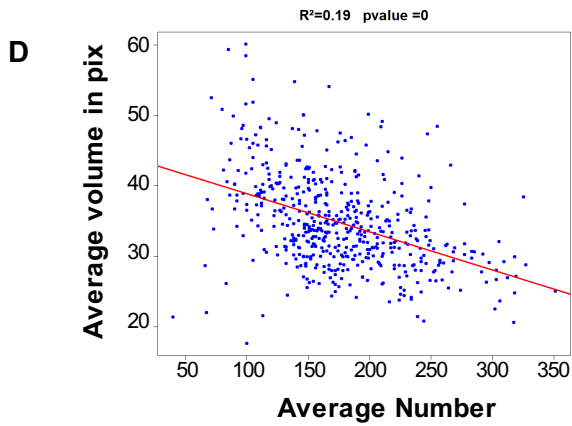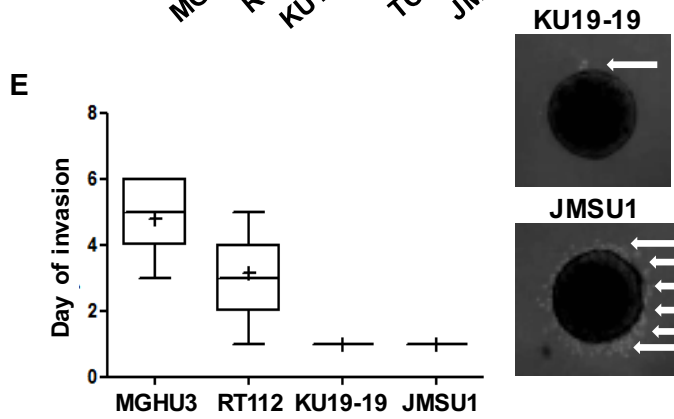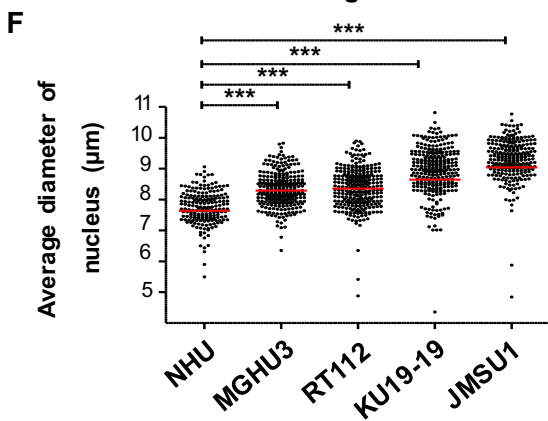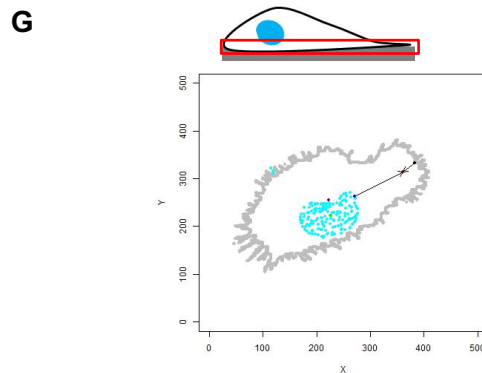

Supplementary Figure 1

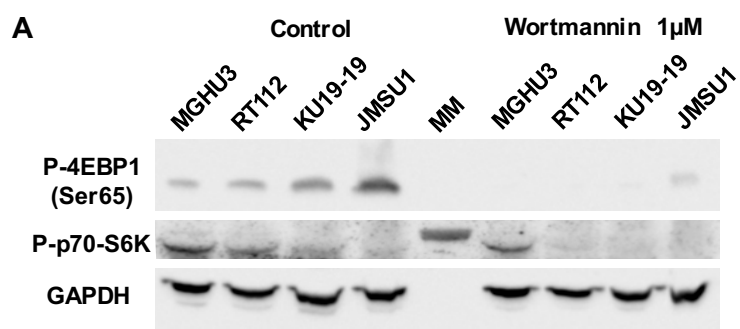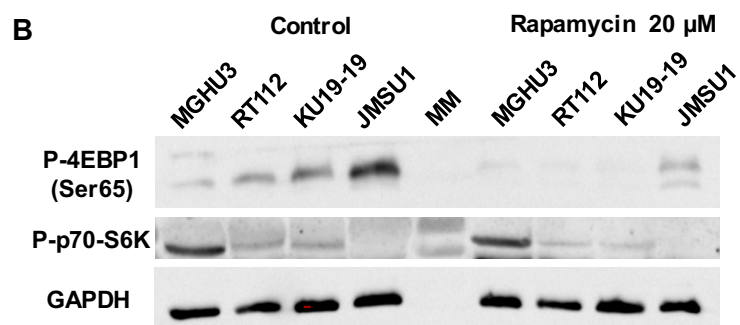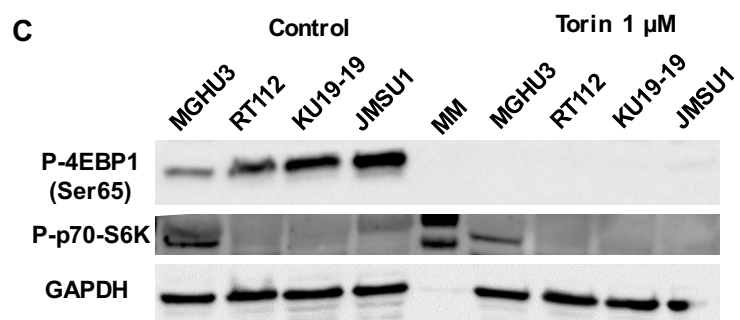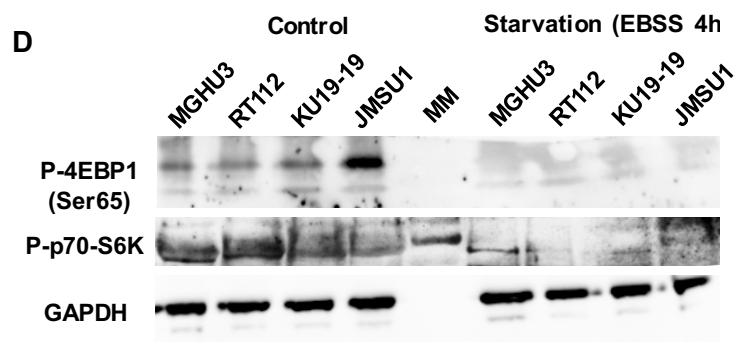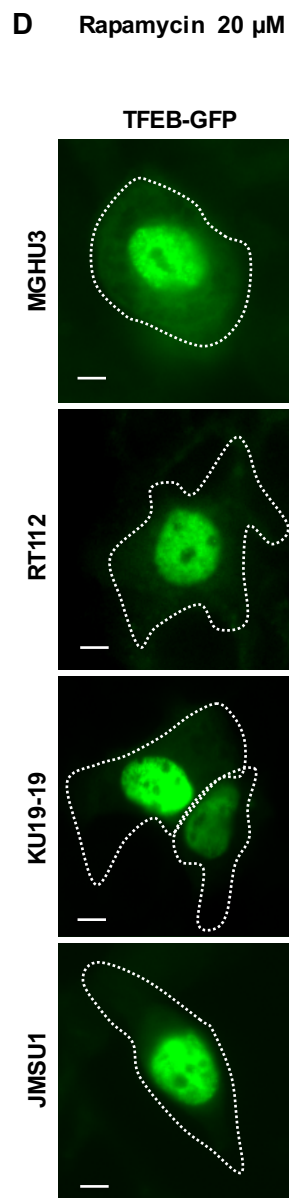

*Supplementary Figure 2*

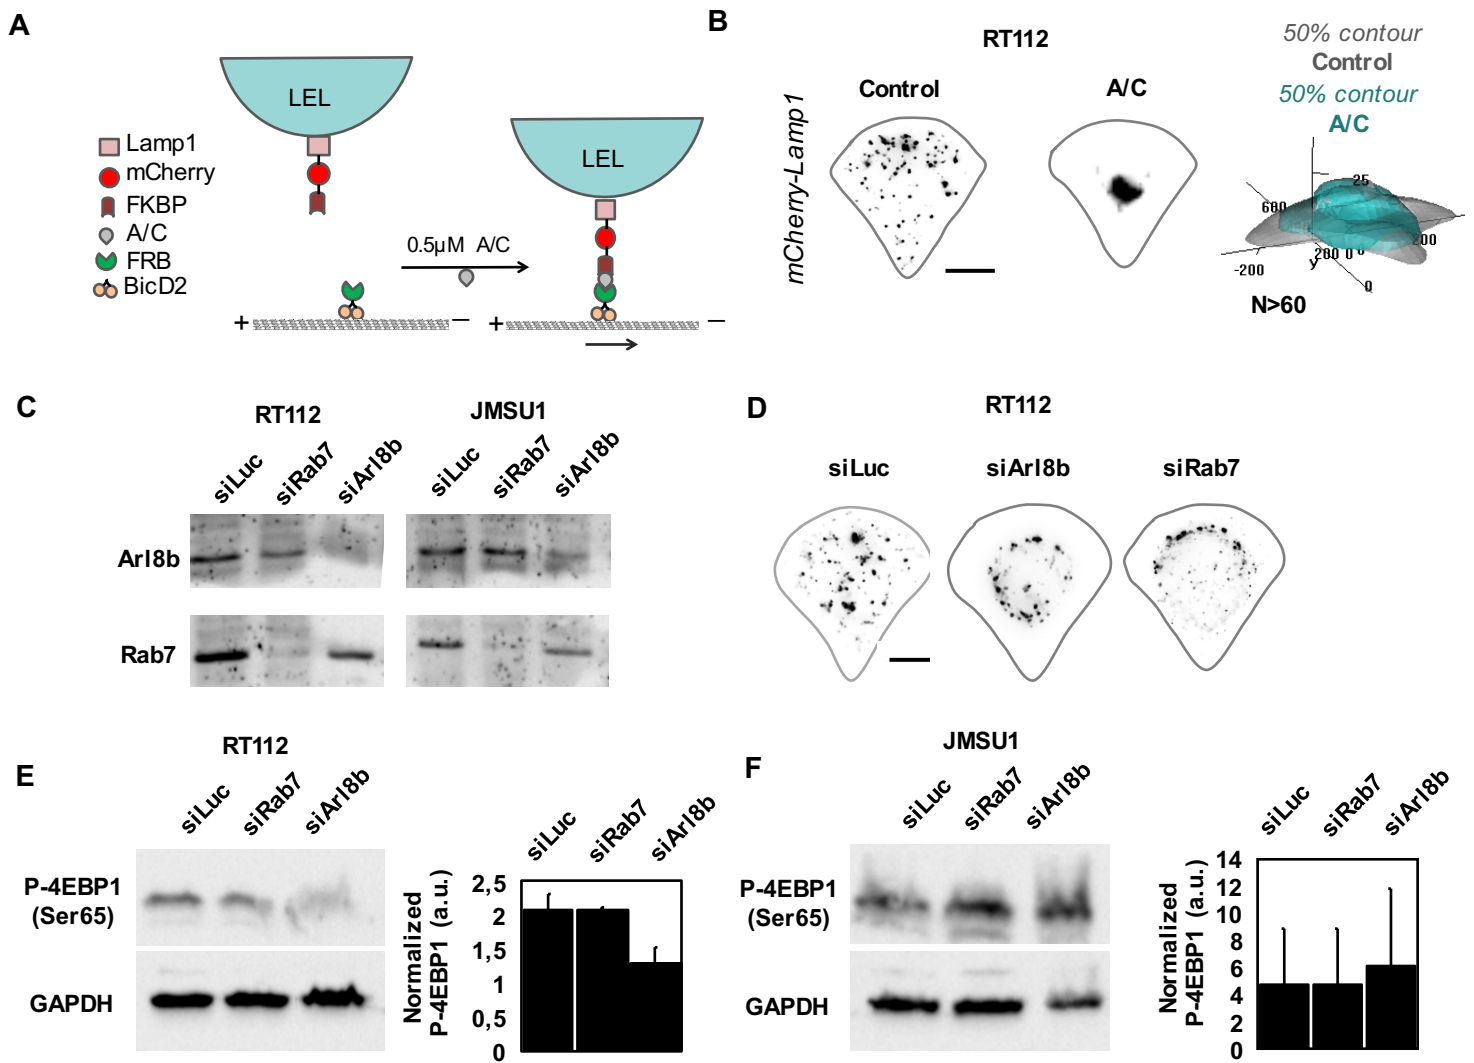

Supplementary Figure 3

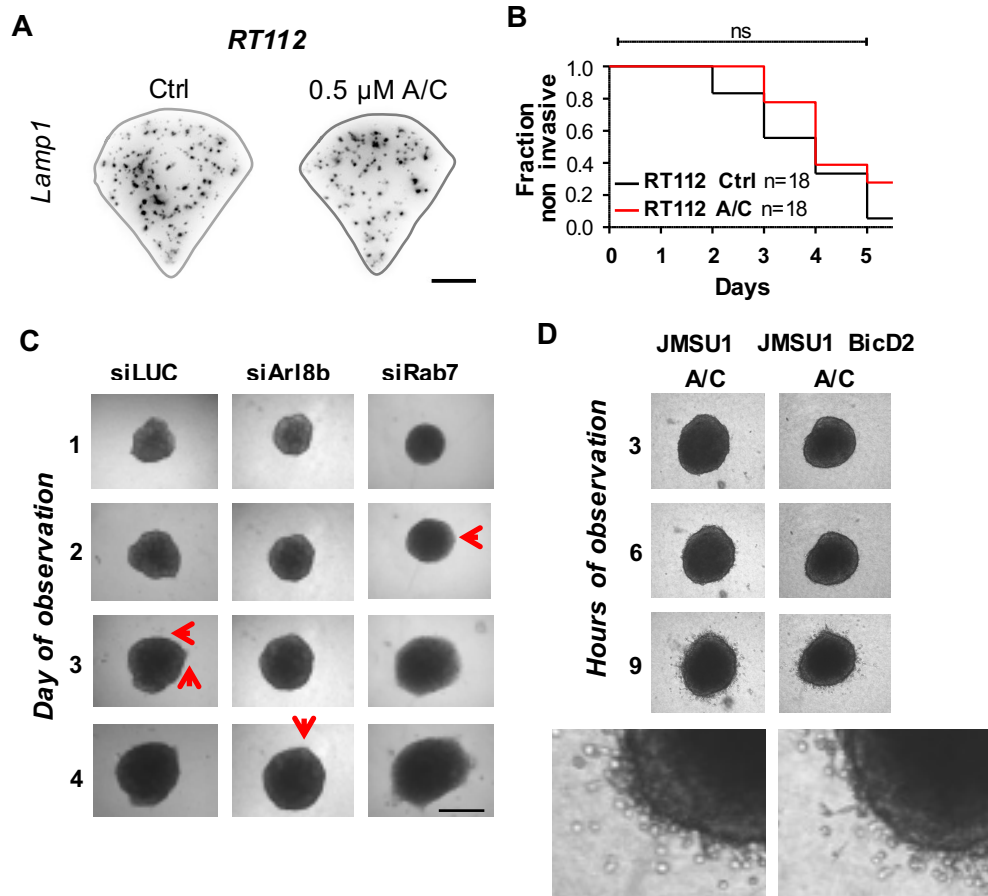

*Supplementary Figure 4*
